# Supplementary material for: Comparison of efficacy of SHENQI compound and rosiglitazone in the treatment of diabetic vasculopathy analyzing multi-factor mediated disease-causing modules
Source: PLoS One. 2018 Dec 6;13(12):e0207683. doi: 10.1371/journal.pone.0207683 (PMC6283585; doi:10.1371/journal.pone.0207683)
Supplement: S5 Table — (XLS) [file pone.0207683.s005.xls]

## Sheet: Pivot_result_sort
Table S5. Pivot prediction results for ncRNA
module	pivot	moduleLinks	Pvalue
1	MMU-MIR-124-3P	40	0.00304664
1	MMU-MIR-1933-3P	4	0.0148373
1	MMU-MIR-470-5P	7	0.0178392
1	MMU-MIR-340-5P	36	0.0136109
1	MMU-MIR-298-5P	16	0.0281272
1	MMU-MIR-301A-3P	19	0.0360425
1	MMU-MIR-3082-5P	11	0.00346862
1	MMU-MIR-466I-5P	18	0.00102482
1	MMU-MIR-466D-5P	16	0.00517248
1	MMU-MIR-106A-5P	22	0.0110041
1	MMU-MIR-15A-5P	33	0.0194191
1	MMU-MIR-142A-5P	3	0.0262027
1	1700007L15RIK	7	0.0127219
1	MMU-MIR-223-3P	17	0.0277222
1	MMU-MIR-338-3P	13	0.0254383
1	MMU-MIR-539-3P	14	0.037542
1	MMU-MIR-721	19	0.0165588
1	MMU-MIR-292A-5P	16	0.00746274
1	MMU-MIR-10A-5P	12	0.0307856
1	MMU-MIR-3105-5P	2	0.0110828
1	MMU-MIR-296-5P	2	0.0444958
1	MMU-MIR-9-5P	27	0.0292905
1	MMU-MIR-5107-5P	3	0.0163405
1	MMU-MIR-1950	4	0.00993968
1	MMU-MIR-191-5P	6	0.0276565
1	MMU-MIR-101B-3P	20	0.0308672
1	MMU-MIR-883B-5P	3	0.00200596
1	MMU-MIR-433-3P	8	0.0492819
1	MMU-MIR-182-5P	15	0.00565028
1	MMU-MIR-877-5P	3	0.0136192
1	MMU-MIR-448-5P	3	0.00293232
1	MMU-MIR-31-5P	12	0.0487953
1	MMU-MIR-468-3P	3	0.0386079
1	MMU-MIR-654-3P	2	0.0222312
1	MMU-MIR-215-5P	6	0.0123081
1	MMU-MIR-466L-5P	14	0.0332607
1	MMU-MIR-21A-5P	15	0.00699803
1	MMU-MIR-3079-5P	2	0.0444958
1	MMU-MIR-466N-5P	6	0.0354426
1	MMU-MIR-188-3P	3	0.00710995
1	MMU-MIR-192-5P	5	0.0461602
2	MMU-MIR-875-5P	7	0.00418198
2	MMU-MIR-190A-5P	11	0.00933003
2	MMU-MIR-883A-3P	3	0.0085126
2	MMU-MIR-721	16	0.00850554
2	MMU-MIR-539-5P	11	0.0465181
2	MMU-MIR-329-3P	20	0.0339323
2	MMU-MIR-1306-5P	2	0.0253802
2	MMU-MIR-199A-5P	9	0.0162629
2	MMU-MIR-340-5P	33	0.000602429
2	MMU-MIR-129-5P	19	0.0302365
2	MMU-MIR-374B-5P	19	0.000184994
2	MMU-MIR-146A-5P	8	0.0157736
2	MMU-MIR-146B-5P	10	0.000899407
2	MMU-MIR-20B-5P	15	0.0437518
2	MMU-MIR-496A-3P	7	0.0221136
2	MMU-MIR-218-5P	8	0.0417257
2	MMU-MIR-23B-3P	18	0.00685171
2	MMU-MIR-381-3P	18	0.00195214
2	MMU-MIR-291A-3P	13	0.0176048
2	MMU-MIR-1942	2	0.0480177
2	MMU-MIR-3086-3P	3	0.00302562
2	MMU-MIR-130B-3P	16	0.015613
2	MMU-MIR-335-5P	7	0.0449654
2	MMU-MIR-221-3P	10	0.0368742
2	MMU-MIR-692	6	0.00925151
2	MMU-MIR-326-3P	7	0.0418839
2	MMU-MIR-3069-3P	2	0.00374364
2	MMU-MIR-3065-5P	6	0.0105451
2	MMU-MIR-702-3P	3	0.0222353
2	MMU-MIR-154-5P	9	0.00907256
2	MMU-MIR-190B-5P	6	0.0438823
2	MMU-MIR-532-3P	2	0.0480177
2	MMU-MIR-704	2	0.0480177
2	MMU-MIR-28A-5P	7	0.0152039
2	MMU-MIR-453	2	0.0418467
2	MMU-MIR-9-3	2	0.0418467
2	1110002J07RIK	2	0.0480177
2	GM5532	2	0.00904797
2	3110083C13RIK	2	0.0305064
2	5430400D12RIK	2	0.020647
2	SNORD13	2	0.0480177
2	MIRT1	3	0.00171389
3	MMU-LET-7E-5P	12	0.000699382
3	MMU-LET-7I-5P	11	0.00170506
3	MMU-MIR-98-5P	8	0.0327085
3	MMU-MIR-302B-3P	8	0.00895492
3	MMU-MIR-140-5P	6	0.0203835
3	MMU-MIR-761	7	0.0110797
3	MMU-MIR-294-3P	7	0.0277186
3	MMU-MIR-19A-3P	12	0.000477383
3	MMU-MIR-290A-5P	7	0.0282266
3	MMU-MIR-128-3P	11	0.00170506
3	MMU-MIR-181C-5P	9	0.0175308
3	MMU-MIR-19B-3P	11	0.0233182
3	MMU-MIR-302A-3P	9	0.00641889
3	MMU-MIR-203-3P	9	0.00459746
3	MMU-MIR-721	8	0.0302511
3	MMU-MIR-224-5P	6	0.0339605
3	MMU-MIR-384-3P	4	0.041442
3	MMU-MIR-30C-5P	9	0.0366906
3	MMU-MIR-504-5P	3	0.0290885
3	MMU-MIR-149-5P	8	0.0322064
3	MMU-MIR-194-5P	6	0.0199152
3	MMU-MIR-199A-5P	5	0.0298189
3	MMU-MIR-374B-5P	9	0.00614823
4	MMU-MIR-125B-5P	6	0.0276848
4	MMU-MIR-362-3P	10	0.00427656
4	MMU-MIR-25-3P	7	0.0151242
4	MMU-MIR-1907	7	0.0044544
4	MMU-MIR-29C-3P	6	0.0149459
4	MMU-MIR-301A-3P	7	0.0220551
4	MMU-MIR-130B-3P	7	0.02029
4	MMU-MIR-130A-3P	9	0.00239856
4	MMU-MIR-29B-3P	6	0.0315136
4	MMU-MIR-221-3P	5	0.0237911
4	MMU-MIR-186-5P	7	0.0109768
4	MMU-MIR-144-3P	7	0.034517
4	MMU-MIR-101A-3P	10	0.00031938
4	MMU-MIR-33-5P	6	0.00557289
4	MMU-MIR-329-3P	8	0.0482038
4	MMU-MIR-96-5P	6	0.0108675
4	MMU-MIR-181D-5P	8	0.011685
4	MMU-MIR-148B-3P	5	0.0485266
4	MMU-MIR-291A-3P	6	0.0187103
4	MMU-MIR-497A-5P	9	0.00895497
4	MMU-MIR-294-3P	6	0.017193
4	MMU-MIR-200C-3P	5	0.0458219
4	MMU-MIR-26B-5P	7	0.0146656
4	MMU-MIR-204-5P	4	0.0337462
4	MMU-MIR-876-5P	5	0.0101505
4	MMU-MIR-139-5P	6	0.0324093
4	MMU-MIR-382-5P	6	0.00327505
4	MMU-MIR-377-3P	7	0.0208669
4	MMU-MIR-208B-3P	3	0.0302499
4	MMU-MIR-323-3P	3	0.0110103
4	MMU-MIR-23A-3P	7	0.0313291
4	MMU-MIR-141-3P	6	0.0206496
4	MMU-MIR-154-5P	4	0.0248768
4	MMU-MIR-7B-5P	9	0.00180183
4	MMU-MIR-342-3P	7	0.00224592
4	MMU-MIR-292A-5P	5	0.0394659
4	MMU-MIR-486A-5P	4	0.00691464
4	MMU-MIR-1967	2	0.00537052
5	MMU-MIR-181D-5P	14	2.26087e-05
5	MMU-MIR-448-3P	7	0.017232
5	MMU-MIR-101A-3P	9	0.00549276
5	MMU-MIR-19B-3P	12	0.00300573
5	MMU-MIR-19A-3P	9	0.00615254
5	MMU-MIR-494-3P	6	0.0468784
5	MMU-MIR-185-5P	5	0.0392894
5	MMU-MIR-15A-5P	13	0.0117815
5	MMU-MIR-291A-3P	6	0.0447974
5	MMU-MIR-497A-5P	9	0.0304642
5	MMU-MIR-17-5P	10	0.0448282
5	MMU-MIR-200B-3P	6	0.0370612
5	MMU-MIR-93-5P	8	0.0453229
5	MMU-MIR-98-5P	7	0.041751
5	MMU-MIR-210-3P	7	0.000152433
5	MMU-MIR-99A-5P	2	0.0283816
5	MMU-MIR-9-5P	10	0.0355671
5	MMU-MIR-26A-5P	10	0.0142708
5	MMU-MIR-195A-5P	12	0.000738556
5	MMU-MIR-330-5P	5	0.00426111
5	MMU-MIR-875-5P	3	0.0434868
5	MMU-MIR-367-3P	7	0.0289892
5	MMU-MIR-92A-3P	7	0.0308247
5	MMU-MIR-32-5P	8	0.0168368
5	MMU-MIR-491-5P	4	0.00995236
5	MMU-MIR-23A-3P	12	0.000321221
5	MMU-MIR-542-3P	4	0.0473002
5	MMU-MIR-301B-3P	9	0.0462634
5	MMU-MIR-181A-5P	16	4.66511e-05
5	MMU-MIR-543-3P	10	0.000480262
5	MMU-MIR-183-5P	5	0.0303466
5	MMU-MIR-181B-5P	13	0.000180364
5	MMU-MIR-141-3P	6	0.0490188
5	MMU-MIR-22-3P	6	0.002064
5	MMU-MIR-25-3P	11	0.000337112
5	MMU-MIR-135A-5P	5	0.0278815
5	MMU-MIR-92B-3P	9	0.00113765
5	MMU-MIR-365-3P	4	0.0061804
5	MMU-MIR-200A-3P	7	0.0127238
5	MMU-MIR-378A-3P	3	0.0434868
5	MMU-MIR-485-5P	3	0.0434868
5	MMU-MIR-1936	2	0.0117152
5	MMU-MIR-761	7	0.00510225
5	1700007L15RIK	3	0.0345561
5	MMU-MIR-215-5P	3	0.0173384
5	MMU-MIR-34A-5P	7	0.0220188
5	MMU-MIR-380-3P	2	0.0457526
5	MMU-MIR-743A-3P	3	0.0236532
5	MALAT1	2	0.0388643
5	GM15850	2	0.00492227
5	SNORD1A	2	0.0145444
5	SNORA24	2	0.0176365
5	GM16754	2	0.00255437
5	E130102H24RIK	2	0.0104029
5	9530052C20RIK	2	0.00689221
5	ACOT9	2	0.00916058
5	MAL13_U6_SNRNA	2	0.0481416
5	MMU-MIR-1982	2	0.0040531
5	SNORA44	2	0.0130962
5	SNORD37	2	0.0130962
5	5330439K02RIK	2	0.00586917
5	RMRP	2	0.0192778
5	SNORD98	2	0.00586917
5	GM4419	2	0.00326327
5	MMU-MIR-146B-5P	4	0.0291871
5	MMU-MIR-1949	2	0.0130962
5	MMU-MIR-3084-3P	2	0.0145444
5	MMU-MIR-5123	2	0.0283816
5	MMU-MIR-201-5P	2	0.0264455
6	MMU-MIR-495-3P	8	0.0387866
6	MMU-MIR-106B-5P	10	0.00402683
6	MMU-MIR-302D-3P	6	0.0318608
6	MMU-MIR-20A-5P	8	0.0415135
6	MMU-MIR-758-3P	5	0.0395606
6	MMU-MIR-3473C	4	0.0256717
6	MMU-MIR-17-5P	12	0.00361436
6	MMU-MIR-129-1-3P	3	0.0319631
6	MMU-MIR-3085-3P	4	0.0154932
6	MMU-MIR-3064-5P	4	0.0132156
6	MMU-MIR-3102-5P	2	0.0325451
6	MMU-MIR-532-5P	2	0.0220682
6	MMU-MIR-93-5P	8	0.027661
6	MMU-MIR-23B-3P	7	0.0472627
6	MMU-MIR-5101	4	0.019076
6	MMU-LET-7I-5P	7	0.0322588
6	MMU-MIR-1943-5P	2	0.0204876
6	MMU-MIR-3470A	3	0.0121281
6	MMU-MIR-1892	2	0.010877
6	MMU-MIR-491-5P	3	0.0408921
6	MMU-MIR-3572-3P	3	0.00152023
6	MMU-MIR-5133	2	0.014674
6	MMU-MIR-693-5P	2	0.0160491
6	MMU-MIR-511-5P	2	0.013353
6	MMU-MIR-500-3P	2	0.00759475
6	MMU-LET-7D-5P	8	0.0150157
6	MMU-LET-7E-5P	8	0.0136964
6	MMU-MIR-344F-3P	2	0.00269576
6	MMU-MIR-30E-3P	3	0.00152023
6	MMU-MIR-291A-5P	2	0.0204876
7	G730013B05RIK	14	0.000138016
7	MMU-MIR-294-3P	5	0.0361083
7	MMU-MIR-20A-5P	7	0.0354668
7	MMU-MIR-125A-5P	5	0.0403209
7	MMU-MIR-101A-3P	6	0.0308446
7	MMU-MIR-103-3P	7	0.0128848
7	MMU-MIR-202-3P	6	0.0113608
7	MMU-MIR-32-5P	7	0.00929764
7	MMU-MIR-874-3P	3	0.00718684
7	MMU-MIR-330-5P	3	0.041776
7	MMU-MIR-351-5P	3	0.0476969
7	MMU-MIR-7A-5P	4	0.0259515
7	MMU-MIR-411-3P	2	0.00310612
7	MMU-MIR-743A-3P	3	0.00993963
7	MMU-MIR-742-3P	2	0.0133057
7	MMU-MIR-141-3P	5	0.041975
7	MMU-MIR-379-5P	3	0.0287351
7	MMU-MIR-26B-5P	6	0.0267742
7	MMU-MIR-466L-3P	3	0.0228304
7	MMU-MIR-133A-3P	3	0.0466827
7	MMU-MIR-133B-3P	3	0.0380501
7	MMU-MIR-193A-3P	3	0.0122331
7	MMU-MIR-486A-5P	3	0.029525
8	MMU-MIR-669M-3P	2	0.0430774
8	MMU-MIR-466C-3P	2	0.0430774
8	MMU-MIR-105	2	0.0161248
8	MMU-MIR-297A-5P	4	0.0239121
8	MMU-MIR-712-5P	2	0.01028
8	MMU-MIR-27B-3P	6	0.0132448
8	MMU-MIR-27A-3P	6	0.0146823
8	MMU-MIR-31-5P	4	0.0132141
8	MMU-MIR-122-5P	4	0.0107526
8	MMU-MIR-382-5P	3	0.0491061
8	MMU-MIR-335-3P	2	0.0399249
8	MMU-MIR-770-5P	2	0.000199254
9	MMU-MIR-488-3P	2	0.0370173
9	MMU-MIR-137-3P	3	0.00796319
9	MMU-MIR-128-3P	3	0.0259093
9	MMU-MIR-491-5P	2	0.0114396
9	MMU-MIR-5127	3	0.00173755
9	MMU-MIR-1896	2	0.0278863
9	MMU-LET-7B-5P	4	0.00952894
9	MMU-MIR-758-3P	3	0.00709874
9	MMU-MIR-182-5P	3	0.00682376
9	MMU-MIR-362-5P	2	0.0374376
9	MMU-MIR-3085-3P	2	0.0176365
9	MMU-MIR-544-3P	2	0.0382837
9	MMU-MIR-374B-5P	3	0.0174252
10	MMU-MIR-155-5P	2	0.0448371
10	MMU-MIR-3064-5P	2	0.00949756
10	MMU-MIR-292A-3P	2	0.000836455
10	MMU-MIR-196B-5P	2	0.0216653
10	MMU-MIR-27A-3P	4	0.00321957
10	MMU-MIR-196A-5P	3	0.00182197
10	MMU-MIR-27B-3P	3	0.0232053
10	MMU-MIR-21A-5P	3	0.00329293
10	MMU-MIR-122-5P	2	0.0304668
11	MMU-MIR-541-5P	2	0.0254764
11	MMU-MIR-882	2	0.0202096
11	MMU-MIR-185-5P	2	0.0341427
11	MMU-MIR-761	2	0.0423654
12	MMU-MIR-148A-3P	2	0.0313145
12	MMU-MIR-214-3P	2	0.0271705
12	MMU-MIR-466K	3	0.00152441
12	MMU-MIR-203-3P	2	0.0305064
12	MMU-MIR-539-5P	2	0.0232763
12	MMU-MIR-338-3P	2	0.0168984
12	MMU-MIR-758-3P	2	0.0178462
13	MMU-MIR-762	2	0.028191
13	MMU-MIR-546	5	0.0308063
13	MMU-MIR-702-3P	3	0.0102263
13	GM2694	5	0.038887
13	MMU-MIR-466J	4	0.0103053
13	MMU-MIR-1956	2	0.0362647
13	MMU-MIR-1892	2	0.045109
13	MMU-MIR-1938	2	0.0497984
13	MMU-MIR-3971	3	0.0127767
13	MMU-MIR-3572-3P	3	0.0127767
13	MMU-MIR-5124A	2	0.0244658
13	MMU-MIR-668-3P	2	0.0118697
13	MMU-MIR-1897-5P	2	0.0497984
13	MMU-MIR-331-3P	2	0.0244658
13	MMU-MIR-327	2	0.00934831
