# Supplementary material for: Comparison of efficacy of SHENQI compound and rosiglitazone in the treatment of diabetic vasculopathy analyzing multi-factor mediated disease-causing modules
Source: PLoS One. 2018 Dec 6;13(12):e0207683. doi: 10.1371/journal.pone.0207683 (PMC6283585; doi:10.1371/journal.pone.0207683)
Supplement: S7 Table — (XLS) [file pone.0207683.s007.xls]

## Sheet: Sheet1
Table S7.Therapeutic effects of Shenqi compound and Rosiglitazone on the module
Type	Module	pivot	moduleLinks	Pvalue
BvsC	1	UBC	2	0.00961974
BvsC	1	UBB	2	0.00961974
BvsC	1	RPS27A	2	0.0156061
BvsC	1	UBA52	2	0.00961974
BvsC	1	FZR1	2	0.00169259
BvsC	2	C4A	4	0.00972527
BvsC	2	MCM8	7	0.00220904
BvsC	2	IFIH1	6	0.00597736
BvsC	4	PFDN1	2	0.0128758
BvsC	4	CCAR1	6	0.0116066
BvsC	6	MCM8	3	0.008314
BvsC	12	ALB	2	0.00421759
BvsC	13	CDH9	2	0.0403609
CvsD	1	PER1	3	0.0441166
CvsD	1	PAK1IP1	3	0.0203232
CvsD	2	IRF7	14	5.78779e-05
CvsD	2	MX2	7	0.00297228
CvsD	2	OAS2	10	0.000545639
CvsD	2	ANAPC16	7	0.0076859
CvsD	2	PLK2	3	0.00224291
CvsD	2	WDR12	2	0.00744526
CvsD	2	RPF2	2	0.00381154
CvsD	2	PES1	2	0.00744526
CvsD	2	DDX52	2	0.00744526
CvsD	2	NIP7	2	0.00130093
CvsD	3	IRF7	6	0.0248329
CvsD	3	IRAK3	2	0.0176269
CvsD	4	CEP57	3	0.00680701
CvsD	5	PER2	2	0.0381694
CvsD	5	RPS27A	3	0.000118992
CvsD	5	UBC	2	0.00361411
CvsD	5	UBA52	2	0.00260295
CvsD	5	UBB	2	0.00260295
CvsD	5	BTRC	2	0.000533681
CvsD	5	FBXL3	2	0.000533681
CvsD	8	CYP2E1	3	0.00625666
CvsD	13	AGRN	3	1.78017e-05
CvsD	13	SDC4	3	1.78017e-05
CvsD	13	GPC6	2	0.000699558
CvsD	13	GPC2	2	0.000699558
CvsD	13	GPC3	3	1.78017e-05
CvsD	13	SDC2	3	1.78017e-05
CvsD	13	GPC4	2	0.000699558
CvsD	13	SDC1	3	1.78017e-05
CvsD	13	HSPG2	3	1.78017e-05
CvsD	13	GPC1	3	1.78017e-05
CvsD	13	SDC3	2	0.000699558
CvsE	1	SDC3	6	0.0350244
CvsE	1	GHRL	2	0.0232106
CvsE	1	PSMD4	13	0.0186817
CvsE	1	PSMD7	12	0.0219314
CvsE	1	PSMD3	11	0.0339359
CvsE	1	STS	4	0.0213333
CvsE	1	COL2A1	6	0.0376159
CvsE	1	COL5A3	6	0.0350244
CvsE	1	NPAS2	2	0.00504491
CvsE	1	CLOCK	2	0.00504491
CvsE	1	H2AFZ	3	0.0118824
CvsE	1	HDAC1	2	0.0410086
CvsE	1	RBBP4	2	0.0159074
CvsE	1	RBL2	2	0.00504491
CvsE	1	E2F4	2	0.00172926
CvsE	1	RBL1	2	0.00172926
CvsE	1	KIF3B	9	0.0451596
CvsE	1	TTC30B	6	0.00333704
CvsE	1	CDK7	3	0.0366843
CvsE	1	ZC3H8	2	0.0410086
CvsE	1	APEX1	2	0.00981285
CvsE	1	BRCA2	2	0.0410086
CvsE	1	RBBP8	2	0.0316121
CvsE	1	RPS25	3	0.0149793
CvsE	1	RPL41	2	0.0316121
CvsE	1	RPN1	2	0.0410086
CvsE	1	RPN2	2	0.0410086
CvsE	1	SSR1	2	0.0232106
CvsE	1	DDOST	2	0.0232106
CvsE	1	SRP19	2	0.0159074
CvsE	1	SEC61B	2	0.0232106
CvsE	1	SRP68	2	0.00504491
CvsE	1	SSR3	2	0.00981285
CvsE	1	SRP9	2	0.0232106
CvsE	1	SRP14	2	0.0232106
CvsE	1	SEC61A2	2	0.0232106
CvsE	1	SRP72	2	0.0232106
CvsE	1	SEC11A	2	0.0159074
CvsE	1	SPCS3	2	0.00504491
CvsE	1	SEC61G	2	0.0232106
CvsE	1	SSR4	2	0.0232106
CvsE	1	SPCS1	2	0.0159074
CvsE	1	SEC61A1	2	0.0232106
CvsE	1	SEC11C	2	0.0159074
CvsE	2	UBC	36	0.00488243
CvsE	2	AR	2	0.00754581
CvsE	2	PCNA	15	0.000939549
CvsE	2	PSMD4	12	0.00222193
CvsE	2	PPP2R5B	10	0.00321249
CvsE	2	PSMD7	11	0.00332049
CvsE	2	CKAP5	15	3.68025e-05
CvsE	2	PSMD3	12	0.000631479
CvsE	2	B4GALT1	2	0.000798333
CvsE	2	CHEK1	12	0.000260705
CvsE	2	GADD45A	3	0.039715
CvsE	2	HAUS4	5	0.010992
CvsE	2	ALDH18A1	2	0.0371208
CvsE	2	CCNA1	2	0.0309382
CvsE	2	NEDD8	2	0.00235032
CvsE	2	RAD23B	2	0.0252134
CvsE	2	POLE3	3	0.00231435
CvsE	2	CETN2	2	0.0252134
CvsE	2	ERCC4	2	0.0309382
CvsE	2	ERCC1	2	0.0252134
CvsE	2	POLD1	2	0.0371208
CvsE	2	USP1	5	0.00691788
CvsE	2	XPC	2	0.0152651
CvsE	2	CDKN1B	2	0.0152651
CvsE	2	TLR4	7	0.00435302
CvsE	2	CAD	2	0.00754581
CvsE	2	NOTCH1	2	0.0199781
CvsE	2	POLE2	2	0.0199781
CvsE	2	MCMBP	2	0.0252134
CvsE	3	ATP5J2	3	0.020936
CvsE	3	RAD23B	3	0.000440452
CvsE	3	UBB	6	3.11593e-05
CvsE	3	UBA52	7	2.29335e-05
CvsE	3	RPS27A	5	0.00130801
CvsE	3	PTCD1	2	0.0407748
CvsE	3	NCOA2	2	0.000952996
CvsE	3	SPTAN1	2	0.000952996
CvsE	3	MYLK	2	0.000952996
CvsE	3	CWC27	8	0.00579464
CvsE	3	SYF2	6	0.0342344
CvsE	3	SART1	7	0.0179839
CvsE	3	DDX23	8	0.0118795
CvsE	3	PPIH	7	0.0232165
CvsE	3	TAF9B	3	0.000842761
CvsE	3	POLE4	3	0.00018841
CvsE	3	TAF9	3	0.001423
CvsE	3	TAF10	3	0.000842761
CvsE	3	TAF12	3	0.000440452
CvsE	3	TAF5	3	0.00110905
CvsE	3	TAF6	3	0.000842761
CvsE	3	TAF4	3	0.000621011
CvsE	3	TAF7	3	0.000440452
CvsE	3	TAF2	3	0.000440452
CvsE	3	POLE3	3	0.000621011
CvsE	3	THOC6	4	0.0367803
CvsE	3	CUL4B	6	0.0184142
CvsE	3	RFC2	3	0.00110905
CvsE	3	RFC4	3	0.00110905
CvsE	3	RFC3	3	0.00110905
CvsE	3	RBX1	4	0.000798194
CvsE	3	RNF111	3	0.000842761
CvsE	3	PRPF19	4	0.000384618
CvsE	3	XAB2	5	1.63001e-05
CvsE	3	UBE2V2	2	0.0220312
CvsE	3	UBE2N	3	0.00321099
CvsE	3	PRKACA	2	0.00636347
CvsE	3	ERCC3	3	0.0026791
CvsE	3	CDK7	3	0.00380324
CvsE	3	RPA2	4	0.000116125
CvsE	3	POLR2G	4	0.00093721
CvsE	3	CCNT1	2	0.0188607
CvsE	3	SUPT16H	2	0.0131641
CvsE	3	GTF2H2	3	0.0026791
CvsE	3	ATR	2	0.0106555
CvsE	3	GTF2H4	3	0.00178754
CvsE	3	RFC5	3	0.000842761
CvsE	3	RPA1	4	0.000152703
CvsE	3	FANCD2	2	0.00459917
CvsE	3	POLR2A	5	0.000144317
CvsE	3	BRCA1	4	0.000116125
CvsE	3	POLR2D	4	0.000674407
CvsE	3	SSRP1	2	0.00636347
CvsE	3	CTDP1	2	0.00838545
CvsE	3	CCNT2	2	0.0188607
CvsE	3	POLR2H	5	6.83583e-05
CvsE	3	GTF2H3	3	0.00178754
CvsE	3	POLR2B	5	0.000144317
CvsE	3	CCNH	3	0.0022054
CvsE	3	MNAT1	2	0.0220312
CvsE	3	BRIP1	2	0.00459917
CvsE	3	CDK9	2	0.0188607
CvsE	3	NELFB	2	0.00636347
CvsE	3	GTF2F1	4	0.000564867
CvsE	3	CCNK	2	0.0188607
CvsE	3	POLR2F	5	8.34346e-05
CvsE	3	CDK12	2	0.00188359
CvsE	3	POLR2J	5	5.54731e-05
CvsE	3	ATM	3	0.0026791
CvsE	3	SUPT5H	2	0.00838545
CvsE	3	CDK2	2	0.0254052
CvsE	3	RPA3	2	0.0220312
CvsE	3	CDK4	3	0.000440452
CvsE	3	ZNF830	3	0.000297518
CvsE	3	XRCC1	3	0.000440452
CvsE	3	PARP1	3	0.000297518
CvsE	3	COPS3	2	0.00188359
CvsE	3	COPS5	2	0.00459917
CvsE	3	AQR	5	6.39155e-06
CvsE	3	ERCC4	3	0.000621011
CvsE	3	ERCC1	3	0.000440452
CvsE	3	COPS4	2	0.00459917
CvsE	3	ERCC6	3	0.000621011
CvsE	3	POLE	3	0.00110905
CvsE	3	CHD1L	3	0.00018841
CvsE	3	RFC1	3	0.000440452
CvsE	3	UVSSA	3	0.000109089
CvsE	3	PARP2	3	0.000297518
CvsE	3	XPA	3	0.000297518
CvsE	3	DDB2	3	0.00018841
CvsE	3	USP7	3	0.000297518
CvsE	3	POLD1	3	0.000842761
CvsE	3	COPS6	2	0.00459917
CvsE	3	LIG3	3	0.000297518
CvsE	3	CUL4A	3	0.000842761
CvsE	3	ERCC5	3	0.00018841
CvsE	3	SUMO2	2	0.0131641
CvsE	3	POLR2I	4	0.000674407
CvsE	3	POLD2	2	0.00636347
CvsE	3	XPC	2	0.00636347
CvsE	3	PIAS1	2	0.00459917
CvsE	3	COPS2	2	0.00636347
CvsE	3	POLR2C	5	0.000100946
CvsE	3	LIG1	3	0.00018841
CvsE	3	POLR2E	5	8.34346e-05
CvsE	3	PPIE	5	1.21836e-05
CvsE	3	HMGN1	2	0.00310247
CvsE	3	COPS8	2	0.00459917
CvsE	3	DDB1	3	0.000621011
CvsE	3	ERCC8	3	0.00018841
CvsE	3	EP300	4	0.000798194
CvsE	3	RAD23A	2	0.00636347
CvsE	3	NCBP1	4	0.000564867
CvsE	3	GTF2F2	4	0.000384618
CvsE	3	POLR2L	5	2.7721e-05
CvsE	3	TTF1	2	0.00188359
CvsE	3	POLR1A	2	0.0106555
CvsE	3	POLR1C	2	0.00838545
CvsE	3	POLR1B	2	0.0106555
CvsE	3	TBP	2	0.0188607
CvsE	3	NELFCD	2	0.00459917
CvsE	3	TAF4B	2	0.00459917
CvsE	3	NELFA	2	0.00459917
CvsE	3	GTF2A2	2	0.0131641
CvsE	3	PRKACB	3	2.24002e-05
CvsE	3	CCND2	2	0.000952996
CvsE	3	POLE2	3	0.000297518
CvsE	3	TAF1L	2	0.00459917
CvsE	3	MMS19	2	0.000321448
CvsE	3	UBTF	2	0.000952996
CvsE	3	CHUK	2	0.00188359
CvsE	3	GTF2B	2	0.0188607
CvsE	3	ZNRD1	2	0.00188359
CvsE	3	FANCI	2	0.00188359
CvsE	3	CDC73	2	0.00636347
CvsE	3	IKBKB	2	0.00188359
CvsE	3	GTF2E1	2	0.0159021
CvsE	3	RNMT	2	0.00188359
CvsE	3	CTR9	2	0.00636347
CvsE	3	TAF11	2	0.0131641
CvsE	3	RRN3	2	0.000952996
CvsE	3	MDC1	2	0.0106555
CvsE	3	POLD3	2	0.00459917
CvsE	3	TAF1A	2	0.000952996
CvsE	3	TCEB3	2	0.00459917
CvsE	3	POLR1D	2	0.00636347
CvsE	3	PAF1	2	0.00459917
CvsE	3	GTF2H2C	2	0.000321448
CvsE	3	TAF1B	2	0.00188359
CvsE	3	TAF1	2	0.00838545
CvsE	3	PRKAR1B	2	0.000952996
CvsE	3	GTF2E2	2	0.0131641
CvsE	3	WDR61	2	0.00636347
CvsE	3	SUPT4H1	2	0.00636347
CvsE	3	CD3EAP	2	0.000952996
CvsE	3	RNGTT	2	0.000952996
CvsE	3	CDK14	2	0.000321448
CvsE	3	NHP2L1	3	0.00445785
CvsE	3	SKIV2L2	2	0.0289744
CvsE	3	HELZ2	2	0.00838545
CvsE	3	RPL10A	2	0.0254052
CvsE	3	RPL10L	2	0.0254052
CvsE	3	RPL27A	2	0.0254052
CvsE	3	RPL23A	2	0.0188607
CvsE	3	RPL5	2	0.0220312
CvsE	3	RPL10	2	0.0254052
CvsE	3	RPLP0	2	0.0289744
CvsE	3	RPL3L	2	0.0220312
CvsE	3	RPL3	2	0.0254052
CvsE	3	RPL17	2	0.0220312
CvsE	3	RPL8	2	0.0254052
CvsE	3	RPS9	2	0.0327309
CvsE	3	RPL9	2	0.0254052
CvsE	3	RPL23	2	0.0220312
CvsE	3	RPS2	2	0.0254052
CvsE	3	RPL4	2	0.0289744
CvsE	3	RPL11	2	0.0254052
CvsE	3	RPL26	2	0.0159021
CvsE	3	RPLP1	2	0.0159021
CvsE	3	RPL13A	2	0.0220312
CvsE	3	RPL32	2	0.0159021
CvsE	3	RPL15	2	0.0159021
CvsE	3	RPL13	2	0.0159021
CvsE	3	RPL34	2	0.0131641
CvsE	3	RPL27	2	0.0188607
CvsE	3	RPL6	2	0.0188607
CvsE	3	RPL12	2	0.0254052
CvsE	3	RPL36	2	0.0131641
CvsE	3	RPL24	2	0.0188607
CvsE	3	RPL21	2	0.0159021
CvsE	3	RPS6	2	0.0254052
CvsE	3	RPL39	2	0.0131641
CvsE	3	RPL22	2	0.0131641
CvsE	3	RPL26L1	2	0.0220312
CvsE	3	RPL36AL	2	0.0131641
CvsE	3	RPL7A	2	0.0220312
CvsE	3	RPL37A	2	0.0131641
CvsE	3	RPL7	2	0.0254052
CvsE	3	RPL31	2	0.0188607
CvsE	3	RPS7	2	0.0254052
CvsE	3	RPL22L1	2	0.0159021
CvsE	3	RPL18A	2	0.0159021
CvsE	3	RPL30	2	0.0131641
CvsE	3	RPL37	2	0.0159021
CvsE	3	RPL36A	2	0.0159021
CvsE	3	RPL19	2	0.0131641
CvsE	3	RPL38	2	0.0188607
CvsE	3	RPL39L	2	0.0131641
CvsE	3	RPL35A	2	0.0159021
CvsE	3	RPLP2	2	0.0159021
CvsE	3	IRAK3	2	0.0159021
CvsE	3	UBA7	2	0.0131641
CvsE	3	UBE2L6	2	0.0131641
CvsE	3	NEDD4L	2	0.0131641
CvsE	3	RAD51	2	0.0106555
CvsE	3	BRCA2	2	0.00838545
CvsE	3	CRNKL1	2	0.0220312
CvsE	3	PLRG1	2	0.0220312
CvsE	3	SNRPA1	2	0.0188607
CvsE	3	CWC22	2	0.0188607
CvsE	3	CDC5L	2	0.0289744
CvsE	3	SNW1	2	0.0289744
CvsE	3	YBX1	2	0.0106555
CvsE	3	U2AF1	2	0.0159021
CvsE	3	PRPF4	2	0.0106555
CvsE	3	SNRPF	2	0.0131641
CvsE	3	SNRPD1	2	0.0188607
CvsE	3	WBP4	2	0.0106555
CvsE	3	SRRM1	2	0.0131641
CvsE	3	SF3A3	2	0.0106555
CvsE	3	GPKOW	2	0.00838545
CvsE	3	WBP11	2	0.00838545
CvsE	3	CTNNBL1	2	0.0106555
CvsE	3	PRPF3	2	0.0159021
CvsE	3	PRPF8	2	0.0159021
CvsE	3	PRPF38A	2	0.0106555
CvsE	3	EIF4A3	2	0.0327309
CvsE	3	RBM17	2	0.0106555
CvsE	3	HNRNPM	2	0.0131641
CvsE	3	SRSF2	2	0.0131641
CvsE	3	HNRNPL	2	0.0106555
CvsE	3	TXNL4A	2	0.0131641
CvsE	3	HNRNPA2B1	2	0.0131641
CvsE	3	SUGP1	2	0.00838545
CvsE	3	DDX46	2	0.0159021
CvsE	3	SNRPN	2	0.0131641
CvsE	3	PRPF40A	2	0.0131641
CvsE	3	DHX16	2	0.0131641
CvsE	3	SNRPC	2	0.0106555
CvsE	3	PHF5A	2	0.0131641
CvsE	3	CSTF1	3	0.000842761
CvsE	3	HNRNPC	2	0.0159021
CvsE	3	SNRPD2	2	0.0188607
CvsE	3	SNRNP200	2	0.0159021
CvsE	3	PABPN1	2	0.0159021
CvsE	3	CLP1	2	0.0159021
CvsE	3	SNRPE	2	0.0159021
CvsE	3	SNRPD3	2	0.0188607
CvsE	3	LSM3	2	0.0106555
CvsE	3	LSM6	2	0.0106555
CvsE	3	DHX38	2	0.0188607
CvsE	3	PAPOLA	2	0.0131641
CvsE	3	SRSF5	2	0.0131641
CvsE	3	HNRNPA3	2	0.0131641
CvsE	3	SF3B1	2	0.0188607
CvsE	3	DHX15	2	0.0131641
CvsE	3	USP39	2	0.00838545
CvsE	3	CPSF1	3	0.000842761
CvsE	3	PPIL1	2	0.0131641
CvsE	3	RBM22	2	0.0131641
CvsE	3	DNAJC8	2	0.0131641
CvsE	3	SRSF4	2	0.0131641
CvsE	3	CWC25	2	0.0106555
CvsE	3	HNRNPH1	2	0.0131641
CvsE	3	SNRNP40	2	0.0106555
CvsE	3	HNRNPD	2	0.0131641
CvsE	3	DDX42	2	0.0131641
CvsE	3	SRSF9	2	0.0159021
CvsE	3	CPSF7	2	0.0106555
CvsE	3	LSM7	2	0.0106555
CvsE	3	U2AF1L4	2	0.0131641
CvsE	3	LSM5	2	0.0106555
CvsE	3	LSM2	2	0.0131641
CvsE	3	CSTF2	2	0.0159021
CvsE	3	SF3B3	2	0.0131641
CvsE	3	PQBP1	2	0.0106555
CvsE	3	BUD31	2	0.0220312
CvsE	3	SNRNP70	2	0.0159021
CvsE	3	SRRM2	2	0.0106555
CvsE	3	PTBP1	2	0.0106555
CvsE	3	DDX5	2	0.0220312
CvsE	3	SF3B5	2	0.0131641
CvsE	3	ALYREF	2	0.0106555
CvsE	3	U2AF2	2	0.0131641
CvsE	3	RBM5	2	0.0106555
CvsE	3	FUS	2	0.00459917
CvsE	3	SF3B2	2	0.0106555
CvsE	3	SRSF7	2	0.0131641
CvsE	3	SRSF1	2	0.0159021
CvsE	3	BCAS2	2	0.0131641
CvsE	3	SF3A1	2	0.0106555
CvsE	3	SMNDC1	2	0.0131641
CvsE	3	PCBP2	2	0.0106555
CvsE	3	HNRNPH2	2	0.0131641
CvsE	3	CPSF4	2	0.0131641
CvsE	3	LSM4	2	0.0106555
CvsE	3	SNRPG	2	0.0131641
CvsE	3	DHX9	2	0.0131641
CvsE	3	HNRNPA1	2	0.0131641
CvsE	3	SRSF3	2	0.0159021
CvsE	3	CSTF3	3	0.00110905
CvsE	3	PCBP1	2	0.0106555
CvsE	3	SNRPB	2	0.0159021
CvsE	3	EFTUD2	2	0.0159021
CvsE	3	SRSF11	2	0.0131641
CvsE	3	PUF60	2	0.0106555
CvsE	3	HNRNPR	2	0.00838545
CvsE	3	CD2BP2	2	0.0106555
CvsE	3	FIP1L1	3	0.00110905
CvsE	3	SRSF6	2	0.0131641
CvsE	3	NUDT21	2	0.0131641
CvsE	3	NAA38	2	0.0106555
CvsE	3	SRRT	2	0.0188607
CvsE	3	SNRPB2	2	0.0131641
CvsE	3	PRCC	2	0.00838545
CvsE	3	PRPF6	2	0.0106555
CvsE	3	HNRNPF	2	0.0131641
CvsE	3	SNRNP27	2	0.00838545
CvsE	3	CPSF2	3	0.00110905
CvsE	3	HNRNPUL1	2	0.00636347
CvsE	3	SF3B4	2	0.0106555
CvsE	3	ELAVL1	2	0.00636347
CvsE	3	RBMX	2	0.00636347
CvsE	3	HNRNPU	2	0.00459917
CvsE	3	ELAVL2	2	0.00310247
CvsE	3	HNRNPK	2	0.00838545
CvsE	3	SF1	2	0.00636347
CvsE	3	PCF11	2	0.0131641
CvsE	3	HNRNPA0	2	0.00310247
CvsE	3	SRSF10	2	0.00188359
CvsE	4	CWC27	6	0.00687328
CvsE	4	RNPS1	10	0.00220306
CvsE	4	SART1	5	0.0261153
CvsE	4	SNRPA	5	0.0310091
CvsE	4	DDX23	6	0.012278
CvsE	4	PPIH	5	0.0317525
CvsE	4	PLOD1	2	0.0003716
CvsE	4	PLOD2	2	0.0003716
CvsE	4	PLOD3	2	0.0003716
CvsE	4	UQCRC1	2	0.000124773
CvsE	4	COX5B	2	0.0003716
CvsE	4	MT-CYB	2	0.000124773
CvsE	4	CYCS	2	0.000737807
CvsE	4	COX5A	2	0.0003716
CvsE	4	UQCRFS1	2	0.000124773
CvsE	4	UQCRC2	2	0.000124773
CvsE	4	PMPCB	2	0.000124773
CvsE	4	CDC5L	3	0.000561455
CvsE	4	BUD31	3	0.000358627
CvsE	4	UBB	4	0.000586716
CvsE	4	UBA52	6	1.51963e-05
CvsE	4	RPS27A	5	0.000147278
CvsE	4	RHOA	2	0.0170008
CvsE	4	ACTR2	2	0.00252661
CvsE	4	DNM1	2	0.00765815
CvsE	4	AP2M1	2	0.00334444
CvsE	4	ARPC1A	2	0.00426892
CvsE	4	WNT5A	2	0.00529762
CvsE	4	TRIP10	2	0.00426892
CvsE	4	ACTR3	2	0.00252661
CvsE	4	AXIN1	4	0.0116581
CvsE	4	GSK3B	2	0.00334444
CvsE	4	FZD2	2	0.00122076
CvsE	4	WNT3A	2	0.00122076
CvsE	4	LRP6	2	0.000737807
CvsE	4	DVL3	2	0.00334444
CvsE	4	FZD1	2	0.0003716
CvsE	4	DVL1	2	0.00334444
CvsE	4	WNT1	2	0.000737807
CvsE	4	WNT8B	2	0.000737807
CvsE	4	SMURF2	2	0.00765815
CvsE	4	CTNNB1	3	0.000358627
CvsE	4	WNT8A	2	0.0003716
CvsE	4	SMURF1	2	0.00642814
CvsE	4	RAC1	3	0.000561455
CvsE	4	AP2A1	2	0.00252661
CvsE	4	AP2S1	2	0.00334444
CvsE	4	CLTCL1	2	0.00426892
CvsE	4	CLTA	2	0.00334444
CvsE	4	ITSN1	2	0.00426892
CvsE	4	AP2A2	2	0.00252661
CvsE	4	AP2B1	2	0.00334444
CvsE	4	CTHRC1	2	0.00181788
CvsE	4	ROR2	2	0.0003716
CvsE	4	FZD6	2	0.000737807
CvsE	4	FZD10	2	0.000124773
CvsE	4	BAMBI	2	0.000124773
CvsE	4	FZD4	2	0.00122076
CvsE	4	WWTR1	2	0.000124773
CvsE	4	FZD8	2	0.0003716
CvsE	4	ACTB	3	0.000154145
CvsE	4	MAP3K7	2	0.00122076
CvsE	4	SLC2A4	2	0.00181788
CvsE	4	POLR2H	3	0.00261969
CvsE	4	POLR2F	4	0.000180686
CvsE	4	POLR2L	2	0.0228365
CvsE	4	TAF9	3	0.000358627
CvsE	4	TAF6	2	0.00642814
CvsE	4	TAF4	2	0.00529762
CvsE	4	PPP1CC	2	0.00181788
CvsE	4	PPARGC1A	2	0.00181788
CvsE	4	TAF1	2	0.00334444
CvsE	4	PPP1CA	2	0.000737807
CvsE	4	PPP1CB	2	0.0003716
CvsE	4	CDC40	3	0.000561455
CvsE	4	PRPF19	3	0.00135145
CvsE	4	SNRPD1	3	0.000278092
CvsE	4	PRPF40A	2	0.00529762
CvsE	4	SNRPD2	3	0.000278092
CvsE	4	SNRPD3	3	0.000278092
CvsE	4	SF3B3	3	0.000154145
CvsE	4	SNRNP70	2	0.00642814
CvsE	4	TAF5	2	0.00765815
CvsE	4	CRNKL1	2	0.00898534
CvsE	4	PLRG1	2	0.00898534
CvsE	4	SNRPA1	2	0.00765815
CvsE	4	CWC22	2	0.00765815
CvsE	4	XAB2	2	0.0188646
CvsE	4	SNW1	3	0.000561455
CvsE	4	CDK7	2	0.0170008
CvsE	4	POLR2G	3	0.00261969
CvsE	4	CCNT1	2	0.00765815
CvsE	4	POLR2A	3	0.00403106
CvsE	4	POLR2D	3	0.00204968
CvsE	4	CCNT2	2	0.00765815
CvsE	4	POLR2B	3	0.00403106
CvsE	4	CDK9	2	0.00765815
CvsE	4	GTF2F1	3	0.00179664
CvsE	4	CCNK	2	0.00765815
CvsE	4	POLR2J	3	0.00232383
CvsE	4	AQR	2	0.0135274
CvsE	4	POLR2I	3	0.00204968
CvsE	4	POLR2C	3	0.00327876
CvsE	4	POLR2E	3	0.00293782
CvsE	4	PPIE	2	0.0170008
CvsE	4	YBX1	2	0.00426892
CvsE	4	U2AF1	2	0.00642814
CvsE	4	SNRPF	2	0.00529762
CvsE	4	SRRM1	2	0.00529762
CvsE	4	SF3A3	2	0.00426892
CvsE	4	GPKOW	2	0.00334444
CvsE	4	CTNNBL1	2	0.00426892
CvsE	4	PRPF3	2	0.00642814
CvsE	4	PRPF8	2	0.00642814
CvsE	4	EIF4A3	2	0.0135274
CvsE	4	RBM17	2	0.00426892
CvsE	4	HNRNPM	2	0.00529762
CvsE	4	SRSF2	2	0.00529762
CvsE	4	HNRNPL	2	0.00426892
CvsE	4	TXNL4A	2	0.00529762
CvsE	4	NCBP1	3	0.00179664
CvsE	4	DDX46	2	0.00642814
CvsE	4	SNRPN	2	0.00529762
CvsE	4	DHX16	2	0.00529762
CvsE	4	PHF5A	2	0.00529762
CvsE	4	CSTF1	2	0.00642814
CvsE	4	HNRNPC	2	0.00642814
CvsE	4	SNRNP200	2	0.00642814
CvsE	4	PABPN1	2	0.00642814
CvsE	4	CLP1	2	0.00642814
CvsE	4	SNRPE	2	0.00642814
CvsE	4	NHP2L1	2	0.0188646
CvsE	4	DHX38	2	0.00765815
CvsE	4	PAPOLA	2	0.00529762
CvsE	4	SRSF5	2	0.00529762
CvsE	4	HNRNPA3	2	0.00529762
CvsE	4	SF3B1	2	0.00765815
CvsE	4	DHX15	2	0.00529762
CvsE	4	TRA2B	2	0.00122076
CvsE	4	GTF2F2	3	0.00135145
CvsE	4	PPIL1	2	0.00529762
CvsE	4	RBM22	2	0.00529762
CvsE	4	DNAJC8	2	0.00529762
CvsE	4	SRSF4	2	0.00529762
CvsE	4	CWC25	2	0.00426892
CvsE	4	HNRNPH1	2	0.00529762
CvsE	4	SNRNP40	2	0.00426892
CvsE	4	HNRNPD	2	0.00529762
CvsE	4	DDX42	2	0.00529762
CvsE	4	SRSF9	2	0.00642814
CvsE	4	CPSF7	2	0.00426892
CvsE	4	U2AF1L4	2	0.00529762
CvsE	4	CCAR1	2	0.00426892
CvsE	4	LSM2	2	0.00529762
CvsE	4	CSTF2	2	0.00642814
CvsE	4	PQBP1	2	0.00426892
CvsE	4	SRRM2	2	0.00426892
CvsE	4	PTBP1	2	0.00426892
CvsE	4	DDX5	2	0.00898534
CvsE	4	SF3B5	2	0.00529762
CvsE	4	U2AF2	2	0.00529762
CvsE	4	RBM5	2	0.00426892
CvsE	4	SF3B2	2	0.00426892
CvsE	4	SRSF1	2	0.00642814
CvsE	4	BCAS2	2	0.00529762
CvsE	4	SF3A1	2	0.00426892
CvsE	4	SMNDC1	2	0.00529762
CvsE	4	CPSF4	2	0.00529762
CvsE	4	SNRPG	2	0.00529762
CvsE	4	DHX9	2	0.00529762
CvsE	4	PPWD1	2	0.00181788
CvsE	4	HNRNPA1	2	0.00529762
CvsE	4	UPF3B	2	0.00529762
CvsE	4	SRSF3	2	0.00642814
CvsE	4	SNRPB	2	0.00642814
CvsE	4	EFTUD2	2	0.00642814
CvsE	4	SRSF11	2	0.00529762
CvsE	4	PUF60	2	0.00426892
CvsE	4	CPSF3	2	0.00642814
CvsE	4	SRSF6	2	0.00529762
CvsE	4	SF3A2	2	0.00529762
CvsE	4	SRRT	3	0.000278092
CvsE	4	SNRPB2	2	0.00529762
CvsE	4	PRCC	2	0.00334444
CvsE	4	PRPF6	2	0.00426892
CvsE	4	HNRNPF	2	0.00529762
CvsE	4	CPSF2	2	0.00765815
CvsE	4	SF3B4	2	0.00426892
CvsE	4	MAGOH	2	0.00642814
CvsE	4	GCFC2	2	0.00181788
CvsE	4	MAGOHB	2	0.00642814
CvsE	4	SKIV2L2	2	0.0119222
CvsE	4	RBM8A	2	0.00642814
CvsE	4	TFIP11	2	0.00122076
CvsE	4	HNRNPK	2	0.00334444
CvsE	4	PCF11	2	0.00529762
CvsE	4	SLU7	2	0.00334444
CvsE	4	CASC3	2	0.00181788
CvsE	4	SNAPC4	2	0.00252661
CvsE	4	TBP	2	0.00765815
CvsE	4	SP1	3	7.31009e-05
CvsE	4	RPL18	7	0.00771112
CvsE	4	RPL14	7	0.00416989
CvsE	4	RPS14	7	0.0225533
CvsE	4	RPL35	6	0.0303754
CvsE	4	GTF2A2	2	0.00529762
CvsE	4	GTF2B	2	0.00765815
CvsE	4	GTF2E1	2	0.00642814
CvsE	4	TAF11	2	0.00529762
CvsE	4	GTF2E2	2	0.00529762
CvsE	4	ELL	2	0.00334444
CvsE	4	GTF2A1	2	0.00426892
CvsE	4	ZC3H8	2	0.00334444
CvsE	4	VWA9	2	0.000737807
CvsE	4	RPRD1A	2	0.00122076
CvsE	4	NABP2	2	0.00122076
CvsE	4	INTS4	2	0.0003716
CvsE	4	CPSF3L	2	0.00122076
CvsE	4	INTS9	2	0.00122076
CvsE	4	INTS3	2	0.000737807
CvsE	4	ZNF143	2	0.00181788
CvsE	4	NABP1	2	0.000737807
CvsE	4	ASUN	2	0.00181788
CvsE	4	SNAPC3	2	0.00181788
CvsE	4	INTS12	2	0.00122076
CvsE	4	INTS7	2	0.0003716
CvsE	4	INTS5	2	0.00122076
CvsE	4	KIAA0947	2	0.00181788
CvsE	4	RPRD1B	2	0.00122076
CvsE	4	EIF3C	5	0.00912481
CvsE	4	SSR2	5	0.00703548
CvsE	4	NEDD4L	2	0.00529762
CvsE	5	PER2	2	0.0360538
CvsE	5	GADD45A	2	0.0483735
CvsE	5	ICT1	7	0.000146205
CvsE	5	MRPL19	7	0.000605222
CvsE	5	MRPL21	7	0.000146205
CvsE	5	PPP5C	3	0.0141646
CvsE	5	KDM1A	3	0.0493018
CvsE	6	ALDH3A1	3	0.00585908
CvsE	6	CCDC101	2	0.0329887
CvsE	6	HIST2H2BE	7	0.0235116
CvsE	6	PHAX	3	0.039745
CvsE	6	PSMD7	4	0.0368386
CvsE	6	ORC6	3	0.00704825
CvsE	6	PSMD3	4	0.0309846
CvsE	6	DTYMK	2	0.0157739
CvsE	6	H3F3A	2	0.0261285
CvsE	6	GUCY2F	2	0.0444325
CvsE	6	EFTUD1	2	0.034803
CvsE	7	H3F3A	2	0.0113278
CvsE	7	COL2A1	2	0.0416936
CvsE	7	PLD2	2	0.0468607
CvsE	8	ME1	3	0.00122908
CvsE	9	PYGO1	2	0.000718233
CvsE	9	SYF2	2	0.0251096
CvsE	9	DDX23	2	0.0393367
CvsE	9	ADCYAP1	2	0.012133
CvsE	13	GNG4	2	0.0156972
CvsE	13	GNG2	2	0.0156972
CvsE	13	GCGR	2	0.019855
CvsE	13	GNB3	2	0.0293616
CvsE	13	NPSR1	2	0.0462748
CvsE	13	ADRB2	3	0.00160573
CvsE	13	GNG8	2	0.019855
CvsE	13	GNGT2	2	0.019855
CvsE	13	ADCY6	2	0.0156972
CvsE	13	GNG5	2	0.019855
CvsE	13	GNG3	2	0.0244173
CvsE	13	NPS	2	0.019855
CvsE	13	GNG13	2	0.0156972
CvsE	13	POMC	2	0.0293616
CvsE	13	GNGT1	2	0.019855
CvsE	13	ADCY1	2	0.00588896
CvsE	13	GNG11	2	0.019855
CvsE	13	GNG10	2	0.0156972
CvsE	13	GNG12	2	0.0244173
CvsE	13	GNG7	11	0.0196939
CvsE	13	BDKRB2	10	0.0108095
CvsE	13	HTR5A	6	0.0397763
CvsE	13	SSTR4	7	0.0446859
CvsE	13	APOB	3	0.00114484
CvsE	13	GPC6	2	0.00182592
CvsE	13	GPC4	2	0.00182592
CvsE	13	HSPG2	3	0.000288051
CvsE	13	AGRN	4	2.40614e-05
CvsE	13	SDC1	4	1.82249e-06
CvsE	13	GPC2	2	0.00182592
CvsE	13	GPC1	3	0.000288051
CvsE	13	GPC3	3	5.97759e-05
CvsE	13	SDC2	4	4.24731e-05
CvsE	13	SDC4	4	1.22681e-05
CvsE	13	NPY	2	0.0156972
CvsE	13	AGTR1	2	0.0346664
CvsE	13	GHSR	2	0.0156972
CvsE	13	RPS6KA4	2	0.00182592
CvsE	13	RPS6KA5	2	0.00182592
CvsE	13	TF	2	0.0156972
CvsE	13	TFRC	2	0.0119672
CvsE	13	ARRB2	2	0.0119672
CvsE	13	SNX9	2	0.00588896
CvsE	13	VAMP3	2	0.00868942
CvsE	13	M6PR	2	0.00588896
CvsE	13	CLTB	2	0.0119672
CvsE	13	PICALM	2	0.0119672
CvsE	13	EGF	2	0.0346664
CvsE	13	AGFG1	2	0.00868942
CvsE	13	DNAJC6	2	0.0156972
CvsE	13	ARRB1	2	0.0119672
CvsE	13	LDLR	2	0.00868942
CvsE	13	VAMP2	2	0.019855
CvsE	13	FNBP1	2	0.00359206
CvsE	13	LDLRAP1	2	0.00359206
CvsE	13	SYT1	2	0.00868942
CvsE	13	DNM1	2	0.0346664
CvsE	13	AP2M1	2	0.0156972
CvsE	13	ARPC1A	2	0.019855
CvsE	13	CFTR	2	0.019855
CvsE	13	WNT5A	2	0.0244173
CvsE	13	TRIP10	2	0.019855
CvsE	13	VAMP8	2	0.00868942
CvsE	13	SCARB2	2	0.00588896
CvsE	13	IGF2R	2	0.00868942
CvsE	13	PIK3C2A	2	0.0156972
CvsE	13	SNAP91	2	0.0119672
CvsE	13	CTTN	2	0.019855
CvsE	13	CBL	2	0.0156972
CvsE	13	AMPH	2	0.00868942
CvsE	13	GAK	2	0.0156972
CvsE	13	DNM3	2	0.0156972
CvsE	13	OCRL	2	0.0156972
CvsE	13	DNM2	2	0.019855
CvsE	13	AVPR2	2	0.0156972
CvsE	13	WASL	2	0.0293616
CvsE	13	EGFR	2	0.0403108
CvsE	13	RAB5A	2	0.0156972
CvsE	13	GAPVD1	2	0.00359206
CvsE	13	STON2	2	0.00588896
CvsE	13	MAPK1	2	0.0156972
CvsE	13	BIN1	2	0.00588896
CvsE	13	DAB2	2	0.00868942
CvsE	13	SYT2	2	0.00182592
CvsE	13	EPN1	2	0.00588896
CvsE	13	AP2A1	2	0.0119672
CvsE	13	AP2S1	2	0.0156972
CvsE	13	EPS15	2	0.0119672
CvsE	13	CLTCL1	2	0.019855
CvsE	13	CLTA	2	0.0156972
CvsE	13	AP2A2	2	0.0119672
CvsE	13	SNX18	2	0.00359206
CvsE	13	AAK1	2	0.00588896
CvsE	13	SYNJ1	2	0.019855
CvsE	13	AP2B1	2	0.0156972
CvsE	13	SLIT1	2	0.0244173
CvsE	13	NTN4	2	0.0293616
CvsE	13	MIB2	2	0.00868942
CvsE	13	BTRC	3	0.00452681
CvsE	13	SKP1	2	0.0462748
CvsE	13	FBXO32	2	0.00868942
CvsE	13	FBXO9	2	0.00868942
CvsE	13	KLHL42	2	0.0119672
CvsE	13	UBE2B	2	0.019855
CvsE	13	UBA3	2	0.00868942
CvsE	13	CDC27	2	0.0244173
CvsE	13	RNF217	2	0.0119672
CvsE	13	HUWE1	2	0.00868942
CvsE	13	RNF144B	2	0.00868942
CvsE	13	FBXL19	2	0.00868942
CvsE	13	HACE1	2	0.0119672
CvsE	13	FBXO7	2	0.00588896
CvsE	13	FBXL4	2	0.0156972
CvsE	13	FBXW7	2	0.0119672
CvsE	13	UBE2E1	2	0.0346664
CvsE	13	UBA7	2	0.0244173
CvsE	13	UBE2R2	2	0.00868942
CvsE	13	AREL1	2	0.00868942
CvsE	13	WWP1	2	0.0119672
CvsE	13	UBE2L6	2	0.0244173
CvsE	13	SMURF1	3	0.00216776
CvsE	13	ZNRF1	2	0.00359206
CvsE	13	CUL3	2	0.0346664
CvsE	13	ZNRF2	2	0.00588896
CvsE	13	TRAF7	2	0.00868942
CvsE	13	RNF4	2	0.019855
CvsE	13	HECTD3	2	0.00868942
CvsE	13	DET1	2	0.00588896
CvsE	13	NEDD4	2	0.00868942
CvsE	13	UBE2D3	2	0.0244173
CvsE	13	CDC34	2	0.00868942
CvsE	13	RNF7	2	0.0156972
CvsE	13	NEDD4L	2	0.0244173
CvsE	13	STAT3	2	0.00588896
CvsE	13	ITGB1	2	0.00868942
CvsE	13	ITGB5	2	0.00868942
CvsE	13	ITGB8	2	0.000618788
CvsE	13	CEL	2	0.000618788
CvsE	13	CTNNB1	2	0.0403108
CvsE	13	LEF1	2	0.00359206
CvsE	13	TCF7L2	2	0.00182592
CvsE	13	BSG	2	0.00182592
CvsE	13	SLC3A2	2	0.00182592
CvsE	13	CYP3A4	2	0.00182592
CvsE	13	AKR1C3	2	0.000618788
CvsE	13	CYP1A1	2	0.000618788
CvsE	13	UGT2B7	2	0.00182592
CvsE	13	UGT1A1	2	0.00182592
CvsE	13	UGT2B17	2	0.000618788
CvsE	13	UGT1A3	2	0.000618788
CvsE	13	UGT2A2	2	0.000618788
CvsE	13	UGT2B15	2	0.000618788
CvsE	13	UGT1A9	2	0.000618788
CvsE	13	UGT1A8	2	0.000618788
CvsE	13	UGT1A5	2	0.000618788
CvsE	13	UGT2B4	2	0.000618788
CvsE	13	UGT1A4	2	0.000618788
CvsE	13	UGT1A6	2	0.000618788
CvsE	13	UGT2B10	2	0.000618788
CvsE	13	UGT1A10	2	0.000618788
CvsE	13	UGT2A3	2	0.000618788
CvsE	13	UGT2B11	2	0.000618788
CvsE	13	UGT1A7	2	0.000618788
CvsE	13	CUL2	2	0.0119672
CvsF	1	TACR1	2	0.025536
CvsF	1	NPSR1	2	0.0449898
CvsF	1	ARRB1	2	0.025536
CvsF	1	PIK3R1	3	0.00573551
CvsF	1	PLCB4	2	0.025536
CvsF	1	PLCB3	2	0.0175261
CvsF	1	PIK3R3	2	0.025536
CvsF	1	PLCB1	2	0.025536
CvsF	1	PLCB2	2	0.0175261
CvsF	1	PIK3CA	4	0.0013461
CvsF	1	GHRL	2	0.025536
CvsF	1	PSMD7	12	0.0307831
CvsF	1	PSMD3	11	0.0460485
CvsF	1	STS	4	0.0251478
CvsF	1	PIK3C3	2	0.010827
CvsF	1	ATG7	2	0.010827
CvsF	1	TRIM25	2	0.025536
CvsF	1	CALM1	2	0.00557434
CvsF	1	CLASP2	2	0.010827
CvsF	1	EIF4A3	4	0.00827913
CvsF	1	EIF4E	2	0.0175261
CvsF	1	EIF4G1	3	0.00150629
CvsF	1	EIF4A1	3	0.00150629
CvsF	1	PABPC1	2	0.0175261
CvsF	1	EIF4B	2	0.00557434
CvsF	1	EIF4A2	2	0.010827
CvsF	1	COL5A3	6	0.0431077
CvsF	1	CUL1	3	0.0171521
CvsF	1	UBB	7	0.000301094
CvsF	1	UBA52	7	0.00130664
CvsF	1	RPS27A	7	0.000942266
CvsF	1	BTRC	4	0.00187815
CvsF	1	UBE2L6	2	0.0449898
CvsF	1	ITCH	2	0.0449898
CvsF	1	CDC20	3	0.00793124
CvsF	1	TRAIP	2	0.00557434
CvsF	1	UBA7	2	0.03473
CvsF	1	RRP1	5	0.0383894
CvsF	1	ARPC1A	2	0.03473
CvsF	1	CLTC	2	0.025536
CvsF	1	ITSN1	2	0.03473
CvsF	1	CLTCL1	2	0.025536
CvsF	1	CLTA	2	0.025536
CvsF	1	SYNJ1	3	0.00255106
CvsF	1	WASL	2	0.03473
CvsF	1	YES1	2	0.025536
CvsF	1	GRB2	2	0.03473
CvsF	1	LYN	2	0.025536
CvsF	1	RASA1	2	0.0175261
CvsF	1	HRAS	2	0.03473
CvsF	1	CDC42	3	0.010557
CvsF	1	CLTB	2	0.010827
CvsF	1	NRAS	2	0.025536
CvsF	1	FYN	2	0.0449898
CvsF	1	ARRB2	2	0.03473
CvsF	1	SMO	2	0.00557434
CvsF	1	CREBBP	3	0.010557
CvsF	1	PSMC5	3	0.00793124
CvsF	1	PSMD1	3	0.00793124
CvsF	1	PSMD10	3	0.00793124
CvsF	1	PSME4	2	0.0449898
CvsF	1	PSMD4	4	0.000612146
CvsF	1	PSMC3	3	0.00793124
CvsF	1	PSMC6	3	0.00793124
CvsF	1	PSMD2	3	0.00793124
CvsF	1	HDAC1	5	1.68573e-05
CvsF	1	PSMB2	2	0.03473
CvsF	1	PSME3	2	0.03473
CvsF	1	PSMC2	3	0.00573551
CvsF	1	PSMB10	2	0.03473
CvsF	1	PSMA4	3	0.00395044
CvsF	1	PSMC1	3	0.00573551
CvsF	1	PSMB7	3	0.00395044
CvsF	1	PSMC4	3	0.00573551
CvsF	1	CDC73	3	0.00255106
CvsF	1	PRKACB	2	0.00557434
CvsF	1	SHH	2	0.010827
CvsF	1	PTCH1	2	0.00557434
CvsF	1	SIN3A	2	0.00191353
CvsF	1	PSME2	2	0.025536
CvsF	1	RBBP7	2	0.025536
CvsF	1	XPO1	3	0.000778281
CvsF	1	PSME1	2	0.025536
CvsF	1	PRKACG	2	0.00191353
CvsF	1	DHH	2	0.00557434
CvsF	1	RBBP4	3	0.00395044
CvsF	1	SIN3B	2	0.00191353
CvsF	1	HDAC2	2	0.010827
CvsF	1	EP300	3	0.0304947
CvsF	1	NOTCH1	2	0.0449898
CvsF	1	KAT2A	2	0.0175261
CvsF	1	KAT2B	2	0.03473
CvsF	1	SNW1	3	0.0358624
CvsF	1	YWHAE	2	0.025536
CvsF	1	H2AFZ	3	0.00793124
CvsF	1	HDAC4	2	0.00557434
CvsF	1	RBL2	2	0.0175261
CvsF	1	HDAC9	2	0.00191353
CvsF	1	YWHAH	2	0.010827
CvsF	1	RBL1	2	0.0175261
CvsF	1	YWHAB	3	0.00150629
CvsF	1	E2F4	2	0.010827
CvsF	1	RBPJ	2	0.00191353
CvsF	1	TTC30B	6	0.00427147
CvsF	1	WDR60	6	0.00270985
CvsF	1	PSMD5	2	0.0449898
CvsF	1	TGFB2	2	0.010827
CvsF	1	VCP	2	0.010827
CvsF	1	CTNNB1	3	0.0136274
CvsF	1	LEF1	2	0.00557434
CvsF	1	TCF7L1	2	0.00557434
CvsF	1	TLE4	2	0.010827
CvsF	1	TLE1	2	0.010827
CvsF	1	TLE3	2	0.010827
CvsF	1	TCF7	2	0.00557434
CvsF	1	TCF7L2	2	0.010827
CvsF	1	POLR2D	5	0.00220619
CvsF	1	POLR2A	4	0.0251478
CvsF	1	POLR2C	5	0.00477764
CvsF	1	POLR2I	4	0.0140998
CvsF	1	NCBP1	4	0.0100001
CvsF	1	POLR2J	5	0.0017669
CvsF	1	NCBP2	5	0.0017669
CvsF	1	POLR2E	5	0.00565842
CvsF	1	POLR2H	5	0.0017669
CvsF	1	POLR2F	5	0.00272002
CvsF	1	POLR2B	5	0.00399886
CvsF	1	GTF2H3	2	0.0449898
CvsF	1	POLR2L	5	0.0010847
CvsF	1	CDK7	3	0.010557
CvsF	1	ZC3H8	2	0.025536
CvsF	1	CCNT2	2	0.0175261
CvsF	1	CCNK	2	0.025536
CvsF	1	CDK9	2	0.025536
CvsF	1	CCNT1	2	0.025536
CvsF	1	PSMD11	2	0.0449898
CvsF	1	PSMD8	2	0.0449898
CvsF	1	WDR12	2	0.03473
CvsF	1	POLR1C	2	0.010827
CvsF	1	EXOSC8	2	0.0449898
CvsF	1	PNO1	2	0.03473
CvsF	1	RPP38	2	0.0175261
CvsF	1	POLR2K	4	0.00544539
CvsF	1	UBE2I	2	0.0449898
CvsF	1	SUMO1	2	0.0449898
CvsF	1	CCNB1	2	0.03473
CvsF	1	MAD2L1	2	0.03473
CvsF	1	EGF	2	0.025536
CvsF	1	PLCG1	2	0.03473
CvsF	1	PIK3C2A	2	0.025536
CvsF	1	OCRL	2	0.03473
CvsF	1	SYNJ2	2	0.025536
CvsF	1	APC	2	0.0449898
CvsF	1	NUP107	4	0.00092909
CvsF	1	NUP43	3	0.00255106
CvsF	1	NUP133	3	0.00793124
CvsF	1	NUP160	4	0.00092909
CvsF	1	RANBP2	4	0.00092909
CvsF	1	RANGAP1	2	0.0175261
CvsF	1	NUP88	3	0.00395044
CvsF	1	AAAS	2	0.025536
CvsF	1	NUP54	3	0.00395044
CvsF	1	NUP50	3	0.00395044
CvsF	1	NUP85	3	0.00573551
CvsF	1	NUP214	3	0.00255106
CvsF	1	TPR	3	0.00395044
CvsF	1	NUP205	2	0.03473
CvsF	1	NUP153	2	0.03473
CvsF	1	NUP155	3	0.00255106
CvsF	1	NUP62	3	0.00395044
CvsF	1	NUP93	3	0.00395044
CvsF	1	NUP35	3	0.00255106
CvsF	1	RAE1	3	0.00255106
CvsF	1	NDC1	3	0.000778281
CvsF	1	NUP37	3	0.00150629
CvsF	1	NUPL2	2	0.00557434
CvsF	1	TNPO3	2	0.00191353
CvsF	1	RBM8A	3	0.0171521
CvsF	1	MAGOH	3	0.0171521
CvsF	1	MAGOHB	3	0.0171521
CvsF	1	UPF3B	3	0.0171521
CvsF	1	RPS25	2	0.025536
CvsF	1	CPSF2	3	0.041682
CvsF	1	CSTF1	3	0.0358624
CvsF	1	THOC7	2	0.03473
CvsF	1	DDX39A	2	0.0449898
CvsF	1	DDX39B	2	0.0449898
CvsF	1	THOC1	2	0.03473
CvsF	1	THOC2	2	0.03473
CvsF	1	CHTOP	2	0.025536
CvsF	1	POLDIP3	2	0.03473
CvsF	1	NXF1	2	0.025536
CvsF	1	THOC5	2	0.03473
CvsF	1	SARNP	2	0.03473
CvsF	1	CSTF3	3	0.0255851
CvsF	1	FYTTD1	2	0.010827
CvsF	1	NXT1	2	0.0175261
CvsF	1	LUZP4	2	0.00557434
CvsF	2	IRF7	14	8.5709e-06
CvsF	2	MX2	7	0.000915795
CvsF	2	UBC	36	0.00611374
CvsF	2	PCNA	15	0.00110025
CvsF	2	POLE2	9	0.0154486
CvsF	2	PPP2R5D	11	0.00877078
CvsF	2	PPP2CB	11	0.0172362
CvsF	2	PSMD7	11	0.00376354
CvsF	2	PSMD3	12	0.000727261
CvsF	2	MIS12	13	1.97581e-06
CvsF	2	ATRIP	6	0.0287208
CvsF	2	CNOT6L	3	0.0242819
CvsF	2	USP1	5	0.00743992
CvsF	2	IL23A	5	0.0020058
CvsF	2	E2F1	2	0.00478177
CvsF	2	NR0B2	2	0.0260924
CvsF	2	FOS	2	0.00478177
CvsF	3	NPSR1	2	0.0100641
CvsF	3	GCG	2	0.0127737
CvsF	3	AVP	2	0.0157628
CvsF	3	NPS	2	0.0100641
CvsF	3	AVPR2	2	0.0157628
CvsF	3	ATP5J2	3	0.0267618
CvsF	3	PTCD1	2	0.0483806
CvsF	3	MRE11A	2	0.0100641
CvsF	3	WRN	2	0.00764624
CvsF	3	RAD51B	2	0.00764624
CvsF	3	RFC2	3	0.00110787
CvsF	3	BARD1	2	0.0127737
CvsF	3	RPA2	3	0.00145603
CvsF	3	ATM	4	6.3376e-05
CvsF	3	RFC5	3	0.00110787
CvsF	3	FANCI	2	0.00553273
CvsF	3	RPA3	2	0.0190194
CvsF	3	CDK2	2	0.0190194
CvsF	3	RBBP8	2	0.00764624
CvsF	3	BRIP1	3	0.000392637
CvsF	3	ERCC1	3	0.00110787
CvsF	3	ATR	2	0.0127737
CvsF	3	RFC4	3	0.00145603
CvsF	3	RPA1	3	0.00145603
CvsF	3	RAD51C	2	0.00764624
CvsF	3	FANCD2	2	0.00764624
CvsF	3	DNA2	2	0.00764624
CvsF	3	BRCA2	2	0.00764624
CvsF	3	BLM	2	0.0100641
CvsF	3	CHEK1	3	0.000580512
CvsF	3	EXO1	2	0.00764624
CvsF	3	RMI1	2	0.0100641
CvsF	3	RFC3	3	0.00110787
CvsF	3	NBN	2	0.0100641
CvsF	3	KAT5	3	0.00145603
CvsF	3	BRCA1	4	6.3376e-05
CvsF	3	RAD51	2	0.00764624
CvsF	3	ERCC4	3	0.000817423
CvsF	3	CD2BP2	8	0.00890397
CvsF	3	PPIH	7	0.0362008
CvsF	3	FIP1L1	10	0.00452517
CvsF	3	CPSF1	9	0.0148883
CvsF	3	SRSF1	9	0.0249351
CvsF	3	DDX23	8	0.0199065
CvsF	3	SART1	7	0.0283533
CvsF	3	HNRNPA1	8	0.0186828
CvsF	3	DHX38	9	0.0205772
CvsF	3	WDR5	2	0.00227125
CvsF	3	TAF10	2	0.00227125
CvsF	3	POLE3	2	0.0127737
CvsF	3	TAF12	2	0.00115048
CvsF	3	TAF4	3	2.97168e-05
CvsF	3	TRRAP	2	0.0037366
CvsF	3	POLE4	3	0.000248971
CvsF	3	TAF2	2	0.00115048
CvsF	3	TAF9B	2	0.00227125
CvsF	3	TAF9	3	0.000144342
CvsF	3	TAF6	3	7.32233e-05
CvsF	3	TAF7	3	2.97168e-05
CvsF	3	TAF5	2	0.00227125
CvsF	3	POLR2G	12	0.042175
CvsF	3	THOC6	4	0.0491536
CvsF	3	ZC3H11A	4	0.0354132
CvsF	3	COPS2	4	0.0372188
CvsF	3	CUL4B	6	0.0277283
CvsF	3	HNRNPA0	6	0.00538139
CvsF	3	TLR7	3	0.00495469
CvsF	3	EP300	2	0.0389241
CvsF	3	UBB	4	0.00301931
CvsF	3	RBX1	4	0.000668198
CvsF	3	UBA52	7	8.78184e-06
CvsF	3	RPS27A	5	0.000724506
CvsF	3	POLR2D	4	0.000804385
CvsF	3	GTF2F2	4	0.000166954
CvsF	3	PPIE	4	0.000668198
CvsF	3	PRPF19	3	0.00672667
CvsF	3	POLR2A	5	0.000129874
CvsF	3	POLR2C	5	0.000129874
CvsF	3	POLR2I	4	0.000804385
CvsF	3	GTF2F1	4	0.000446086
CvsF	3	NCBP1	3	0.00672667
CvsF	3	POLR2J	5	4.34553e-05
CvsF	3	XAB2	4	0.000668198
CvsF	3	NCBP2	4	0.000668198
CvsF	3	POLR2E	6	1.09084e-05
CvsF	3	POLR2H	5	4.34553e-05
CvsF	3	POLR2F	5	6.96364e-05
CvsF	3	POLR2B	4	0.00132918
CvsF	3	GTF2H3	2	0.0100641
CvsF	3	CUL4A	2	0.0100641
CvsF	3	DDB2	2	0.00764624
CvsF	3	POLR2L	5	2.56241e-05
CvsF	3	ERCC8	2	0.00764624
CvsF	3	POLR2K	4	0.000282371
CvsF	3	ERCC6	2	0.0225321
CvsF	3	GTF2H2	2	0.0157628
CvsF	3	CDK7	2	0.0190194
CvsF	3	DDB1	2	0.0127737
CvsF	3	CCNH	2	0.0157628
CvsF	3	ERCC3	3	0.000817423
CvsF	3	GTF2H4	3	0.000817423
CvsF	3	AQR	4	0.000357568
CvsF	3	UVSSA	2	0.00227125
CvsF	3	ZNF830	2	0.00553273
CvsF	3	POLE	2	0.0157628
CvsF	3	UBE2V2	2	0.00553273
CvsF	3	UBE2N	4	0.000124312
CvsF	3	USP7	2	0.00764624
CvsF	3	CHD1L	2	0.00553273
CvsF	3	TCEA1	2	0.0127737
CvsF	3	XPA	2	0.00764624
CvsF	3	POLD2	2	0.0157628
CvsF	3	LIG1	2	0.00764624
CvsF	3	RFC1	2	0.0157628
CvsF	3	LIG3	2	0.0100641
CvsF	3	PARP1	2	0.00764624
CvsF	3	XRCC1	2	0.0100641
CvsF	3	PARP2	2	0.00764624
CvsF	3	POLD1	2	0.0157628
CvsF	3	ERCC5	2	0.00764624
CvsF	3	SUPT5H	2	0.0037366
CvsF	3	CTR9	2	0.0037366
CvsF	3	TCEB3B	2	0.00227125
CvsF	3	CCNK	2	0.00553273
CvsF	3	CDC73	2	0.00764624
CvsF	3	TAF1	2	0.0037366
CvsF	3	CDK9	2	0.00553273
CvsF	3	SSRP1	2	0.0037366
CvsF	3	NELFB	2	0.0037366
CvsF	3	TCEB3CL	2	0.00227125
CvsF	3	IKBKB	2	0.0037366
CvsF	3	NELFE	2	0.0037366
CvsF	3	MDC1	2	0.0037366
CvsF	3	CCNT1	2	0.00553273
CvsF	3	CHUK	2	0.00553273
CvsF	3	TCEB3C	2	0.00227125
CvsF	3	TCEB3CL2	2	0.00227125
CvsF	3	WDR61	2	0.0037366
CvsF	3	IKBKG	2	0.00227125
CvsF	3	SUPT4H1	2	0.0037366
CvsF	3	TCEB3	2	0.0037366
CvsF	3	NHP2L1	3	0.00580005
CvsF	3	RPL37	2	0.00553273
CvsF	3	RPL26	2	0.00764624
CvsF	3	RPL7A	2	0.0100641
CvsF	3	RPLP2	2	0.00553273
CvsF	3	SENP3	2	0.00764624
CvsF	3	PELP1	2	0.00764624
CvsF	3	RPL24	2	0.00764624
CvsF	3	RPL12	2	0.0100641
CvsF	3	RPL22L1	2	0.00764624
CvsF	3	RPL35	2	0.00553273
CvsF	3	RPL11	2	0.00764624
CvsF	3	RPL39	2	0.00553273
CvsF	3	RPL18A	2	0.00553273
CvsF	3	RPL38	2	0.00764624
CvsF	3	LAS1L	2	0.00764624
CvsF	3	RPLP1	2	0.00553273
CvsF	3	RPL7	2	0.0100641
CvsF	3	RPS14	2	0.0127737
CvsF	3	RPL10A	2	0.00764624
CvsF	3	RPS9	2	0.0157628
CvsF	3	RPL22	2	0.00553273
CvsF	3	RPL36	2	0.00553273
CvsF	3	RPL26L1	2	0.00764624
CvsF	3	RPL23	2	0.00764624
CvsF	3	RPL6	2	0.00764624
CvsF	3	RPL5	2	0.00553273
CvsF	3	TEX10	2	0.0100641
CvsF	3	RPL37A	2	0.00553273
CvsF	3	RPL3L	2	0.00764624
CvsF	3	RPL3	2	0.00764624
CvsF	3	RPL27	2	0.00764624
CvsF	3	RPL32	2	0.00553273
CvsF	3	RPL27A	2	0.00764624
CvsF	3	RPL23A	2	0.00553273
CvsF	3	RPS6	2	0.0127737
CvsF	3	RPLP0	2	0.0127737
CvsF	3	RPL19	2	0.00553273
CvsF	3	RPL10L	2	0.00764624
CvsF	3	RPL30	2	0.00553273
CvsF	3	RPL18	2	0.00553273
CvsF	3	RPL15	2	0.00553273
CvsF	3	RPL21	2	0.00553273
CvsF	3	RPS7	2	0.0157628
CvsF	3	RPL39L	2	0.00553273
CvsF	3	RPL10	2	0.00764624
CvsF	3	RPL13A	2	0.00764624
CvsF	3	RPL13	2	0.00553273
CvsF	3	RPS2	2	0.0127737
CvsF	3	RPL31	2	0.00764624
CvsF	3	RPL35A	2	0.00553273
CvsF	3	RPL8	2	0.00764624
CvsF	3	RPL9	2	0.00764624
CvsF	3	RPL17	2	0.00553273
CvsF	3	RPL36A	2	0.00553273
CvsF	3	RPL4	2	0.0100641
CvsF	3	RPL34	2	0.00553273
CvsF	3	RPL36AL	2	0.0037366
CvsF	3	SKIV2L2	2	0.0435555
CvsF	3	SKP1	2	0.0225321
CvsF	3	SMURF2	2	0.0127737
CvsF	3	CUL1	2	0.0262896
CvsF	3	BTRC	2	0.0262896
CvsF	3	FBXW5	2	0.00553273
CvsF	3	STUB1	2	0.0037366
CvsF	3	NEDD4	2	0.0037366
CvsF	3	ITCH	3	0.000392637
CvsF	3	WWP1	2	0.0037366
CvsF	3	SKP2	2	0.0127737
CvsF	3	CCNF	2	0.00553273
CvsF	3	SMURF1	2	0.0127737
CvsF	3	TRIP12	2	0.00227125
CvsF	3	NEDD4L	3	0.000248971
CvsF	3	FBXO4	2	0.00227125
CvsF	3	IRF7	6	0.033144
CvsF	3	UBE2L6	2	0.0100641
CvsF	3	UBA7	2	0.00764624
CvsF	3	UBE2V1	3	0.000392637
CvsF	3	UBE2B	2	0.0127737
CvsF	3	UBE2A	2	0.00227125
CvsF	3	UBE2U	2	0.00227125
CvsF	3	CWC22	2	0.0302811
CvsF	3	CPSF2	3	0.00495469
CvsF	3	NUDT21	2	0.034496
CvsF	3	PLRG1	2	0.0302811
CvsF	3	U2AF1	2	0.0389241
CvsF	3	CPSF7	2	0.0302811
CvsF	3	SRRT	2	0.0302811
CvsF	3	CLP1	2	0.0302811
CvsF	3	SF3A3	2	0.0262896
CvsF	3	ELAVL1	2	0.0262896
CvsF	3	PRCC	2	0.0262896
CvsF	3	SNRPD2	2	0.0302811
CvsF	3	SRSF7	2	0.034496
CvsF	3	SF3B4	2	0.0302811
CvsF	3	PRPF8	2	0.0302811
CvsF	3	CWC25	2	0.0262896
CvsF	3	HNRNPC	2	0.0302811
CvsF	3	EFTUD2	2	0.0302811
CvsF	3	PRPF3	2	0.0302811
CvsF	3	SNRPG	2	0.0225321
CvsF	3	SF3A1	2	0.0262896
CvsF	3	DDX5	2	0.0389241
CvsF	3	CRNKL1	2	0.0302811
CvsF	3	SNRPB	2	0.0302811
CvsF	3	SRSF10	2	0.00764624
CvsF	3	HNRNPH1	2	0.034496
CvsF	3	U2AF1L4	2	0.0302811
CvsF	3	SNRNP200	2	0.0302811
CvsF	3	HNRNPH2	2	0.0302811
CvsF	3	CSTF1	3	0.0041885
CvsF	3	ALYREF	2	0.034496
CvsF	3	GPKOW	2	0.0262896
CvsF	3	RBM17	2	0.0262896
CvsF	3	PRPF4	2	0.0262896
CvsF	3	SRSF11	2	0.034496
CvsF	3	LSM5	2	0.0157628
CvsF	3	CTNNBL1	2	0.0262896
CvsF	3	SF1	2	0.0190194
CvsF	3	HNRNPD	2	0.0302811
CvsF	3	PHF5A	2	0.0262896
CvsF	3	DDX42	2	0.0302811
CvsF	3	SNRPC	2	0.0262896
CvsF	3	HNRNPA3	2	0.0302811
CvsF	3	BUD31	2	0.0262896
CvsF	3	SF3B2	2	0.0302811
CvsF	3	SNRPB2	2	0.0302811
CvsF	3	U2AF2	2	0.0389241
CvsF	3	HNRNPM	2	0.034496
CvsF	3	SF3B3	2	0.0389241
CvsF	3	PRPF6	2	0.0262896
CvsF	3	WBP4	2	0.0190194
CvsF	3	SRSF4	2	0.034496
CvsF	3	SNRNP40	2	0.0302811
CvsF	3	FUS	2	0.0225321
CvsF	3	CDC5L	2	0.0435555
CvsF	3	HNRNPU	2	0.0225321
CvsF	3	SRSF6	2	0.034496
CvsF	3	DHX15	2	0.0302811
CvsF	3	SNRPF	2	0.0225321
CvsF	3	SRSF5	2	0.034496
CvsF	3	SNRPE	2	0.0190194
CvsF	3	PRPF38A	2	0.0225321
CvsF	3	DDX46	2	0.034496
CvsF	3	NAA38	2	0.0157628
CvsF	3	DHX16	2	0.0262896
CvsF	3	HSPA8	2	0.0389241
CvsF	3	HNRNPK	2	0.0262896
CvsF	3	LSM3	2	0.0157628
CvsF	3	SNW1	2	0.0435555
CvsF	3	LSM6	2	0.0190194
CvsF	3	HNRNPL	2	0.0302811
CvsF	3	SUGP1	2	0.0225321
CvsF	3	SRSF9	2	0.034496
CvsF	3	LSM4	2	0.0190194
CvsF	3	PUF60	2	0.0302811
CvsF	3	SNRNP70	2	0.034496
CvsF	3	RBM22	2	0.0302811
CvsF	3	USP39	2	0.0225321
CvsF	3	LSM2	2	0.0225321
CvsF	3	SNRPD3	2	0.0302811
CvsF	3	HNRNPA2B1	2	0.0302811
CvsF	3	SF3B1	2	0.0389241
CvsF	3	PTBP1	2	0.0302811
CvsF	3	DHX9	2	0.0302811
CvsF	3	YBX1	2	0.0302811
CvsF	3	CSTF2	2	0.034496
CvsF	3	PABPN1	2	0.034496
CvsF	3	PPIL1	2	0.0262896
CvsF	3	CWC27	2	0.0262896
CvsF	3	CPSF4	2	0.034496
CvsF	3	LSM7	2	0.0225321
CvsF	3	SNRPA1	2	0.0262896
CvsF	3	SRRM2	2	0.0225321
CvsF	3	TXNL4A	2	0.0225321
CvsF	3	SMNDC1	2	0.0262896
CvsF	3	WBP11	2	0.0190194
CvsF	3	PQBP1	2	0.0262896
CvsF	3	PRPF40A	2	0.0262896
CvsF	3	BCAS2	2	0.0302811
CvsF	3	SNRPD1	2	0.0302811
CvsF	3	DNAJC8	2	0.0262896
CvsF	3	HNRNPF	2	0.034496
CvsF	3	SNRPN	2	0.0302811
CvsF	3	SRSF2	2	0.034496
CvsF	3	PAPOLA	2	0.0302811
CvsF	3	RBM5	2	0.0262896
CvsF	3	SRSF3	2	0.034496
CvsF	3	HNRNPR	2	0.0190194
CvsF	3	ELAVL2	2	0.0127737
CvsF	3	SRRM1	2	0.0302811
CvsF	3	RBMX	2	0.0190194
CvsF	3	HNRNPUL1	2	0.0190194
CvsF	3	PCF11	2	0.0302811
CvsF	3	PCBP1	2	0.0225321
CvsF	3	PCBP2	2	0.0225321
CvsF	3	CSTF3	3	0.00288419
CvsF	3	SNRNP27	2	0.0190194
CvsF	3	SF3B5	2	0.0190194
CvsF	3	MYC	2	0.00764624
CvsF	4	RNPS1	10	0.00506395
CvsF	4	NHP2L1	2	0.0234305
CvsF	4	PPIH	5	0.0483237
CvsF	4	RBM8A	3	0.00050278
CvsF	4	CWC22	3	0.000634158
CvsF	4	POLR2D	3	0.00249662
CvsF	4	CPSF2	3	0.00137132
CvsF	4	NUDT21	2	0.0148598
CvsF	4	PLRG1	3	0.000634158
CvsF	4	TFIP11	3	0.0001531
CvsF	4	U2AF1	3	0.000958202
CvsF	4	CPSF7	3	0.000634158
CvsF	4	SRRT	3	0.000634158
CvsF	4	CLP1	3	0.000634158
CvsF	4	SF3A3	3	0.00050278
CvsF	4	CPSF3	3	0.000958202
CvsF	4	ELAVL1	2	0.0112191
CvsF	4	GTF2F2	3	0.000785585
CvsF	4	PRCC	3	0.00050278
CvsF	4	CCAR1	3	0.000390259
CvsF	4	SNRPD2	4	2.10625e-05
CvsF	4	SRSF7	2	0.0148598
CvsF	4	SF3B4	3	0.000634158
CvsF	4	PRPF8	3	0.000634158
CvsF	4	CWC25	3	0.00050278
CvsF	4	PPIE	3	0.00217563
CvsF	4	HNRNPC	3	0.000634158
CvsF	4	EFTUD2	3	0.000634158
CvsF	4	PRPF3	3	0.000634158
CvsF	4	SNRPG	2	0.00957045
CvsF	4	SF3A1	3	0.00050278
CvsF	4	DDX5	3	0.000958202
CvsF	4	CRNKL1	3	0.000634158
CvsF	4	SNRPB	3	0.000634158
CvsF	4	PRPF19	4	9.63154e-05
CvsF	4	POLR2A	3	0.00406647
CvsF	4	HNRNPH1	3	0.000785585
CvsF	4	U2AF1L4	3	0.000634158
CvsF	4	SNRNP200	3	0.000634158
CvsF	4	CSTF1	3	0.0011531
CvsF	4	ALYREF	2	0.0148598
CvsF	4	POLR2C	3	0.00406647
CvsF	4	GPKOW	3	0.00050278
CvsF	4	RBM17	3	0.00050278
CvsF	4	PRPF4	2	0.0112191
CvsF	4	DDX23	6	0.0206183
CvsF	4	SRSF11	3	0.000785585
CvsF	4	CTNNBL1	3	0.00050278
CvsF	4	SART1	5	0.0400675
CvsF	4	SNRPA	5	0.0472401
CvsF	4	SKIV2L2	3	0.0011531
CvsF	4	HNRNPD	3	0.000634158
CvsF	4	PHF5A	2	0.0112191
CvsF	4	DDX42	3	0.000634158
CvsF	4	SNRPC	2	0.0112191
CvsF	4	HNRNPA3	3	0.000634158
CvsF	4	BUD31	3	0.00050278
CvsF	4	SF3B2	3	0.000634158
CvsF	4	MAGOH	3	0.00050278
CvsF	4	SNRPB2	3	0.000634158
CvsF	4	U2AF2	3	0.000958202
CvsF	4	HNRNPM	3	0.000785585
CvsF	4	SF3B3	4	3.75767e-05
CvsF	4	PRPF6	3	0.00050278
CvsF	4	WBP4	2	0.00804042
CvsF	4	POLR2I	3	0.00249662
CvsF	4	SRSF4	3	0.000785585
CvsF	4	SNRNP40	3	0.000634158
CvsF	4	FUS	2	0.00957045
CvsF	4	CDC5L	3	0.0011531
CvsF	4	HNRNPU	2	0.00957045
CvsF	4	SRSF6	3	0.000785585
CvsF	4	DHX15	3	0.000634158
CvsF	4	SNRPF	2	0.00957045
CvsF	4	SRSF5	3	0.000785585
CvsF	4	HNRNPA1	6	0.0195772
CvsF	4	SNRPE	2	0.00804042
CvsF	4	GTF2F1	3	0.00161386
CvsF	4	PRPF38A	2	0.00957045
CvsF	4	DDX46	3	0.000785585
CvsF	4	SF3A2	3	0.00050278
CvsF	4	DHX16	3	0.00050278
CvsF	4	HSPA8	3	0.000958202
CvsF	4	HNRNPK	2	0.0112191
CvsF	4	NCBP1	3	0.00188166
CvsF	4	GCFC2	3	0.0001531
CvsF	4	SNW1	3	0.0011531
CvsF	4	PRPF31	2	0.0112191
CvsF	4	HNRNPL	3	0.000634158
CvsF	4	SUGP1	2	0.00957045
CvsF	4	SRSF9	3	0.000785585
CvsF	4	LSM4	2	0.00804042
CvsF	4	PUF60	3	0.000634158
CvsF	4	POLR2J	2	0.0283142
CvsF	4	PPWD1	3	0.000295348
CvsF	4	SLU7	3	0.00050278
CvsF	4	MAGOHB	3	0.00050278
CvsF	4	SNRNP70	3	0.000785585
CvsF	4	XAB2	3	0.00217563
CvsF	4	RBM22	3	0.000634158
CvsF	4	USP39	2	0.00957045
CvsF	4	LSM2	2	0.00957045
CvsF	4	POLR2E	3	0.00453396
CvsF	4	DHX38	6	0.0453225
CvsF	4	SNRPD3	4	2.10625e-05
CvsF	4	SF3B1	3	0.000958202
CvsF	4	PTBP1	3	0.000634158
CvsF	4	DHX9	3	0.000634158
CvsF	4	YBX1	3	0.000634158
CvsF	4	CDC40	4	4.86756e-05
CvsF	4	CSTF2	3	0.000785585
CvsF	4	POLR2H	2	0.0283142
CvsF	4	PABPN1	3	0.000785585
CvsF	4	PPIL1	3	0.00050278
CvsF	4	CWC27	3	0.00050278
CvsF	4	CPSF4	3	0.000785585
CvsF	4	UPF3B	3	0.00050278
CvsF	4	SNRPA1	3	0.00050278
CvsF	4	SRRM2	3	0.000390259
CvsF	4	TXNL4A	3	0.000390259
CvsF	4	SMNDC1	3	0.00050278
CvsF	4	WBP11	3	0.000295348
CvsF	4	PQBP1	3	0.00050278
CvsF	4	POLR2F	3	0.00284545
CvsF	4	POLR2B	3	0.00362966
CvsF	4	PRPF40A	3	0.00050278
CvsF	4	BCAS2	3	0.000634158
CvsF	4	SNRPD1	4	2.10625e-05
CvsF	4	EIF4A3	3	0.00161386
CvsF	4	DNAJC8	3	0.00050278
CvsF	4	HNRNPF	3	0.000785585
CvsF	4	SNRPN	3	0.000634158
CvsF	4	CYCS	2	0.00153514
CvsF	4	UQCRC1	2	0.000157328
CvsF	4	MT-CYB	2	0.000157328
CvsF	4	COX5B	2	0.000157328
CvsF	4	UQCRFS1	2	0.000157328
CvsF	4	UQCRC2	2	0.000157328
CvsF	4	COX5A	2	0.000157328
CvsF	4	PMPCB	2	0.000157328
CvsF	4	RHOA	2	0.00804042
CvsF	4	AXIN1	4	0.0171652
CvsF	4	FZD1	2	0.000468135
CvsF	4	LRP6	2	0.000928642
CvsF	4	CTNNB1	2	0.00957045
CvsF	4	DVL3	2	0.00228398
CvsF	4	WNT8A	2	0.000468135
CvsF	4	DVL1	2	0.00317159
CvsF	4	UBB	3	0.0067225
CvsF	4	UBA52	4	0.00136662
CvsF	4	RPS27A	3	0.0110142
CvsF	4	WNT3A	2	0.000928642
CvsF	4	FZD2	2	0.000928642
CvsF	4	WNT8B	2	0.000468135
CvsF	4	GSK3B	2	0.00534913
CvsF	4	WNT1	2	0.000468135
CvsF	4	RAC1	3	0.000390259
CvsF	4	DNM1	2	0.00317159
CvsF	4	FZD4	2	0.000928642
CvsF	4	ARPC1A	2	0.00317159
CvsF	4	ROR2	2	0.000157328
CvsF	4	FZD8	2	0.000468135
CvsF	4	AP2B1	2	0.00153514
CvsF	4	FZD6	2	0.000468135
CvsF	4	ACTR2	2	0.00228398
CvsF	4	AP2S1	2	0.00153514
CvsF	4	AP2A1	2	0.00153514
CvsF	4	WNT5A	2	0.00153514
CvsF	4	CLTC	2	0.00228398
CvsF	4	ITSN1	2	0.00317159
CvsF	4	ACTR3	2	0.00228398
CvsF	4	CLTCL1	2	0.00228398
CvsF	4	CLTA	2	0.00228398
CvsF	4	AP2M1	2	0.00153514
CvsF	4	AP2A2	2	0.00153514
CvsF	4	FZD10	2	0.000157328
CvsF	4	PAK2	2	0.00228398
CvsF	4	ACTB	2	0.00804042
CvsF	4	MAP4K4	2	0.000157328
CvsF	4	MAP3K7	2	0.00153514
CvsF	4	WDR82	2	0.000928642
CvsF	4	SRSF2	2	0.0148598
CvsF	4	PAPOLA	2	0.0129833
CvsF	4	RBM5	2	0.0112191
CvsF	4	SRSF3	2	0.0148598
CvsF	4	SRRM1	2	0.0129833
CvsF	4	PCF11	2	0.0129833
CvsF	4	CHERP	2	0.00663222
CvsF	4	CASC3	2	0.00663222
CvsF	4	PPP1CC	2	0.00317159
CvsF	4	PPP1CB	2	0.00228398
CvsF	4	AQR	2	0.021134
CvsF	4	PPP1CA	2	0.00228398
CvsF	4	RPL14	7	0.00776245
CvsF	4	EIF3C	5	0.0145105
CvsF	5	MRPL21	7	0.000204529
CvsF	5	PTCD3	7	0.000131616
CvsF	6	CCDC101	2	0.0255931
CvsF	6	PSMD7	4	0.0234818
CvsF	6	PSMD3	4	0.0196138
CvsF	6	ATG5	2	0.016536
CvsF	7	PPY	2	0.0367152
CvsF	7	DCN	2	0.0295487
CvsF	7	FGFR3	2	0.010837
CvsF	7	MX2	2	0.0285767
CvsF	8	CYP2E1	3	0.0144565
CvsF	8	UBC	9	0.0440125
CvsF	8	APOA1	3	0.00657282
CvsF	8	STAM2	2	0.0196982
CvsF	9	BCL9L	2	0.000378729
CvsF	9	TLE2	2	0.00184303
CvsF	9	SYF2	2	0.0253835
CvsF	9	DDX23	2	0.0397873
CvsF	9	DDX21	2	0.00373877
CvsF	13	GNG7	11	0.0307157
CvsF	13	SDC4	2	0.00674412
CvsF	13	HSPG2	2	0.00993952
CvsF	13	AGRN	3	0.000353325
CvsF	13	GPC3	2	0.00674412
CvsF	13	SDC1	2	0.00411855
CvsF	13	GPC6	2	0.00209603
CvsF	13	GPC2	2	0.00209603
CvsF	13	GPC4	2	0.00209603
CvsF	13	GPC1	2	0.00411855
CvsF	13	SDC2	2	0.00993952
CvsF	13	NTN4	2	0.0333909
CvsF	13	WDR59	2	0.0179134
CvsF	13	SMURF1	2	0.0226319
CvsF	13	GHSR	2	0.00411855
CvsF	13	NPSR1	2	0.0179134
CvsF	13	GCG	2	0.0226319
CvsF	13	NPS	2	0.0179134
CvsF	13	GCGR	2	0.00993952
CvsF	13	GNB5	2	0.00674412
CvsF	13	PIK3CA	2	0.0393783
CvsF	13	STAT3	2	0.00674412
CvsF	13	CEL	2	0.000711175
CvsF	13	CYP1A1	2	0.00411855
CvsF	13	CYP3A4	2	0.00411855
CvsF	13	AKR1C3	2	0.00209603
